# Supplementary material for: Thiopurines Induce Oxidative Stress in T-Lymphocytes: A Proteomic Approach
Source: PubMed Central journal article supplement (PMC4385670; doi:10.1155/2015/434825), 2015-03-22
Supplement: 434825.f1.pdf [file 434825.f1.pdf]

Suppl. Figure 1(a)

Jur wt DMSO

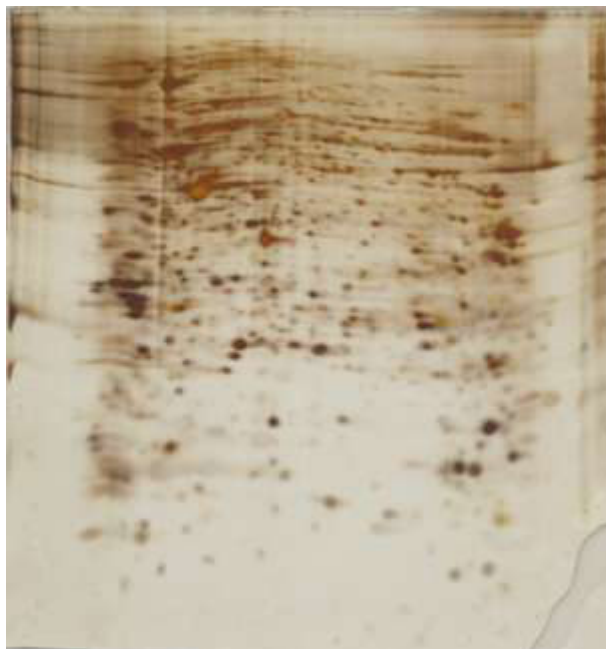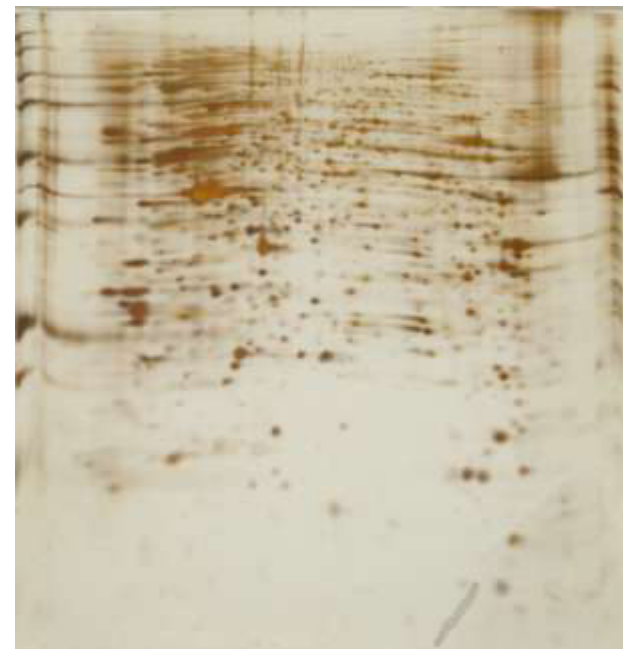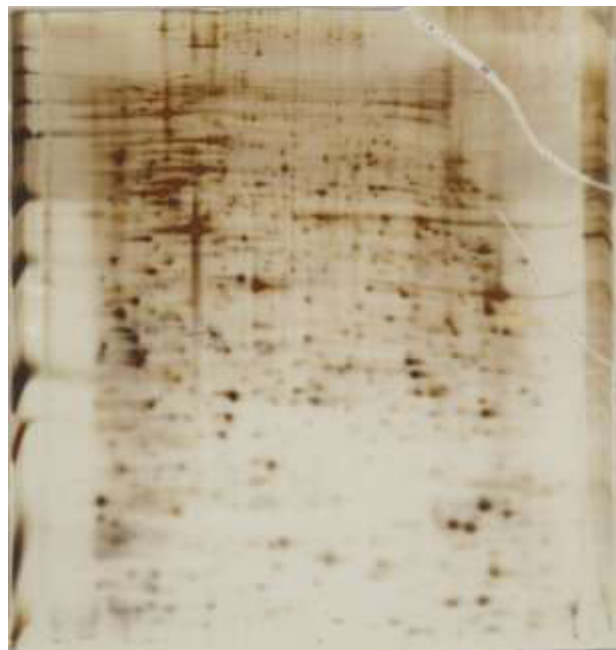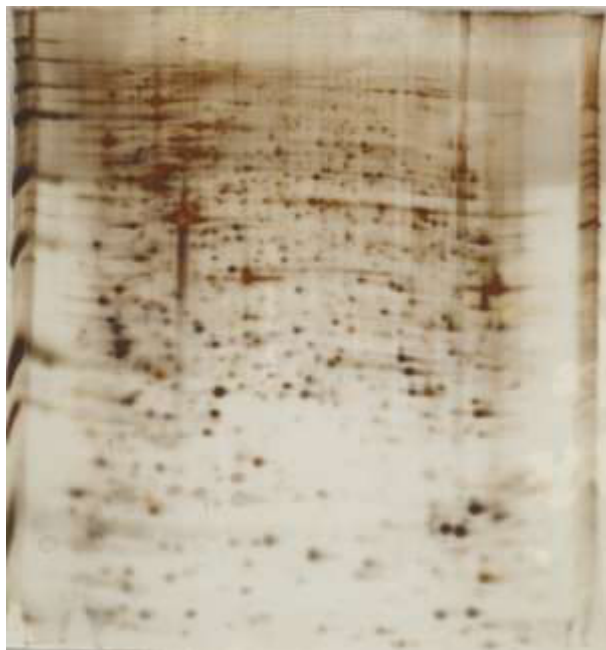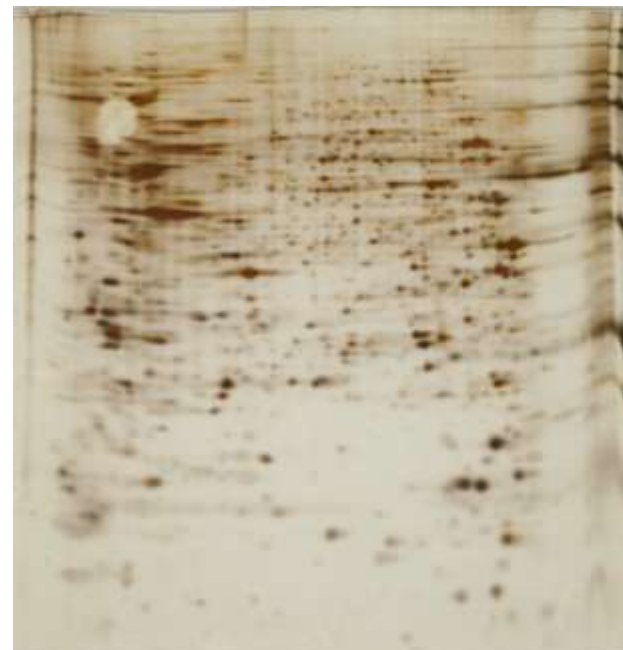

Jur wt 6-MP

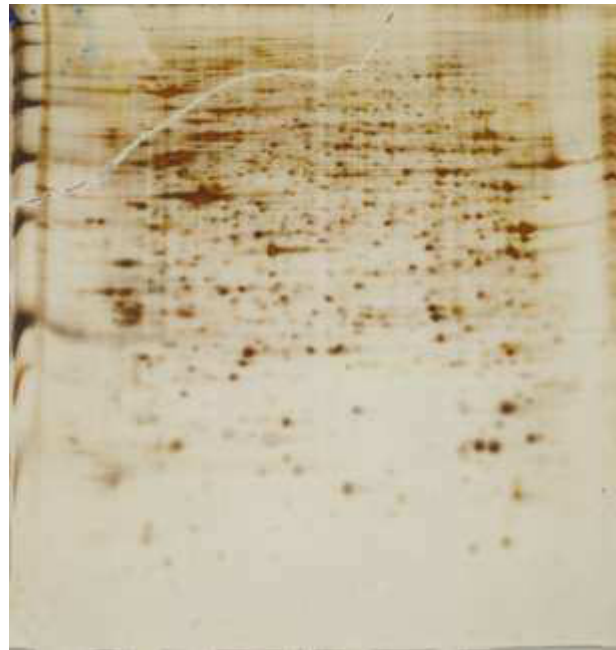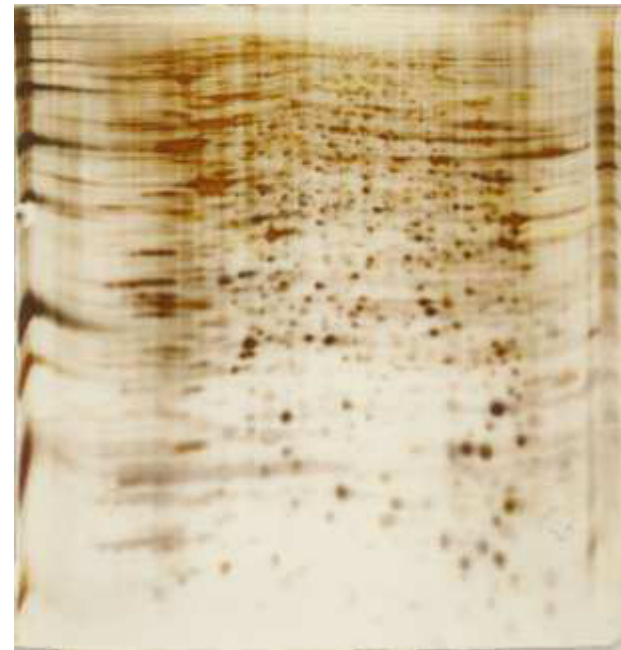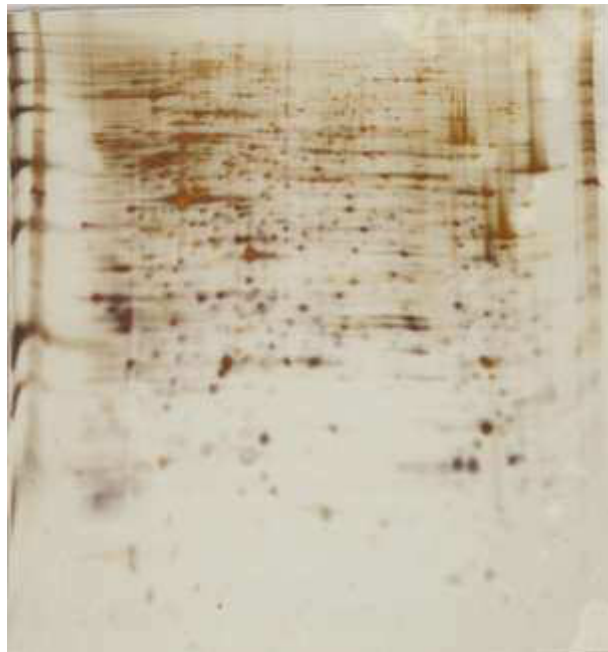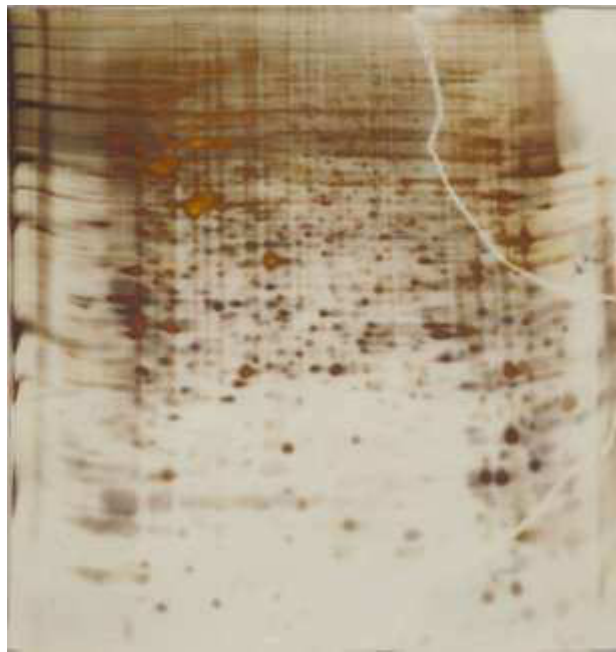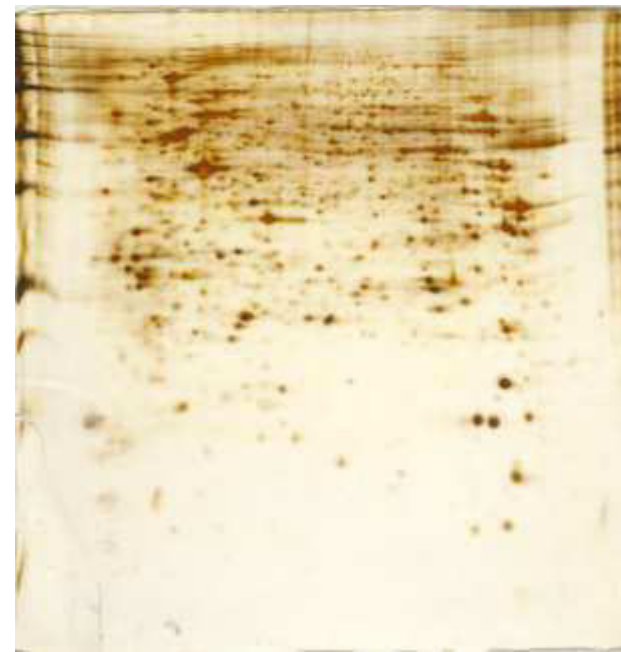

Jur wt 6-TG

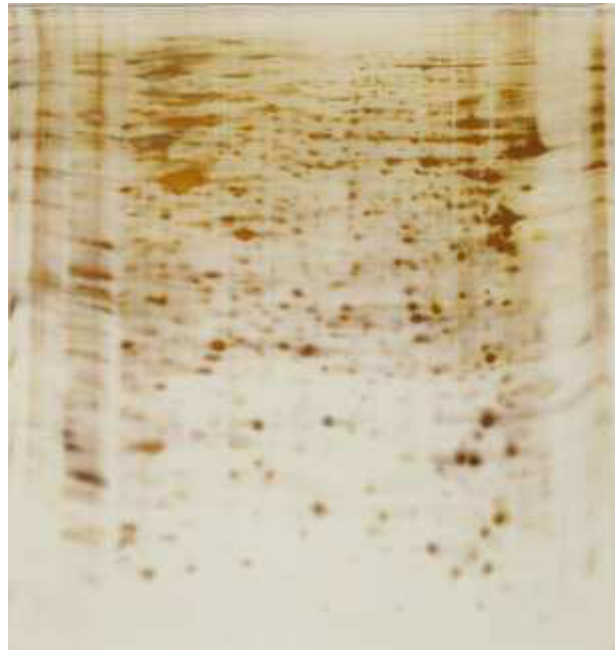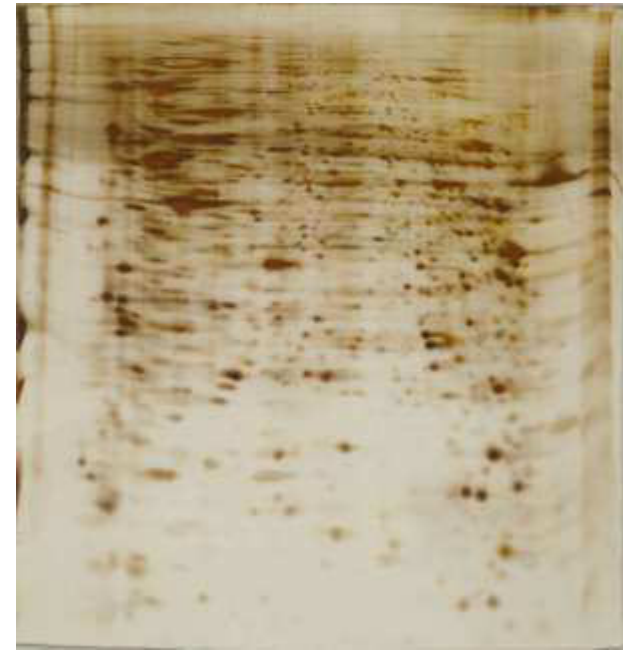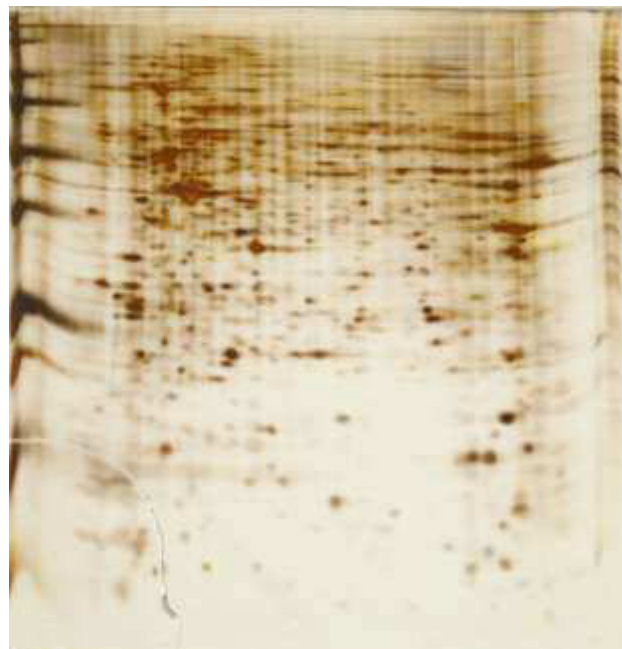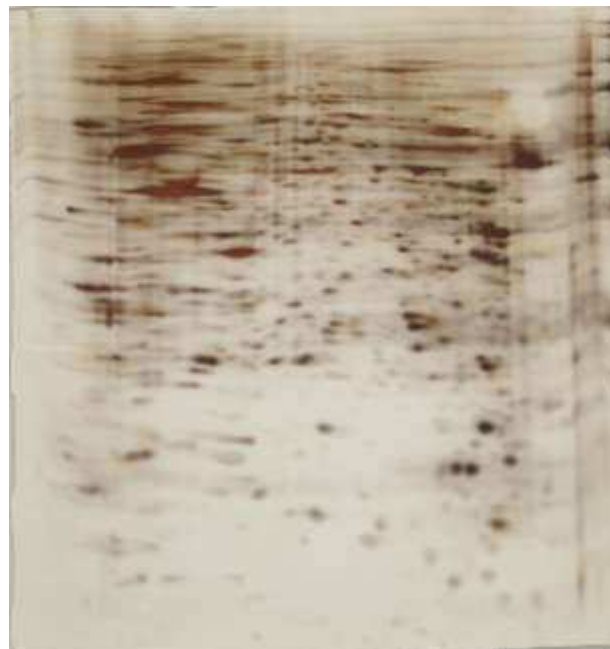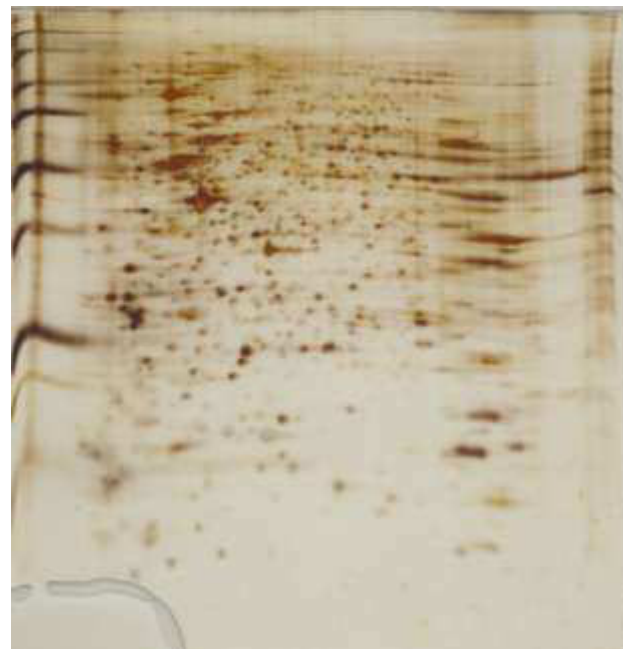

Jur kd DMSO

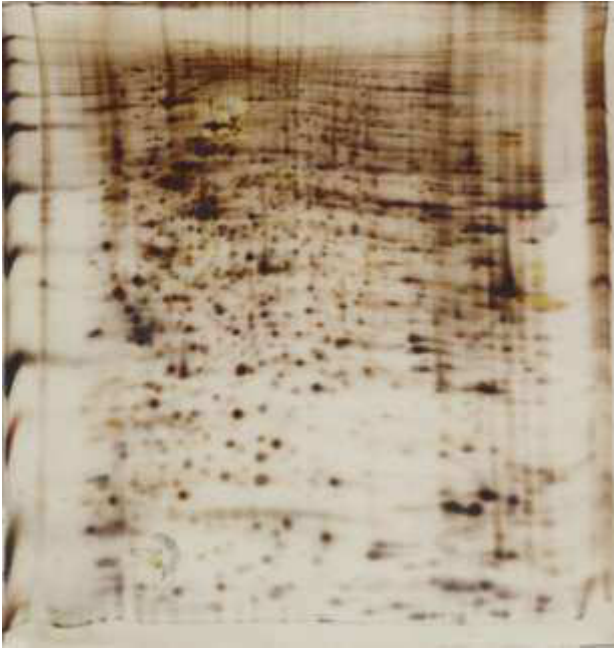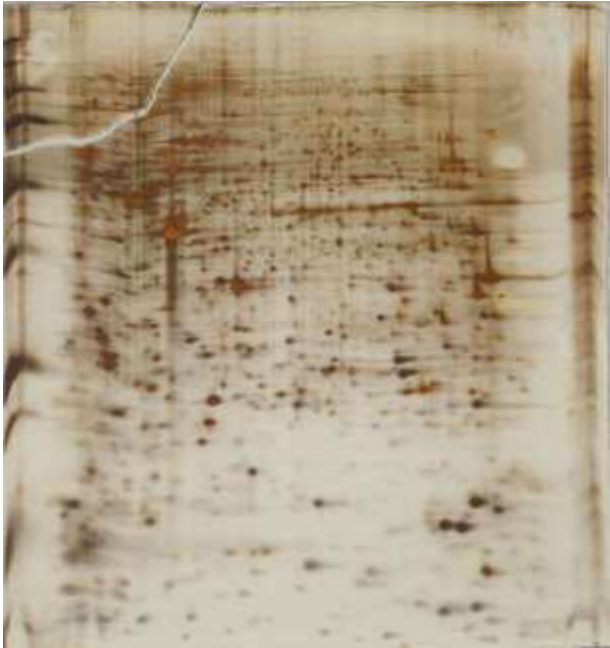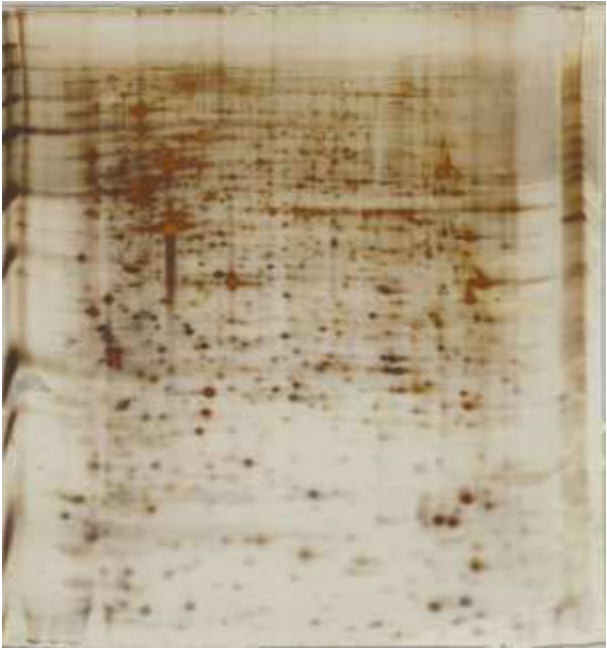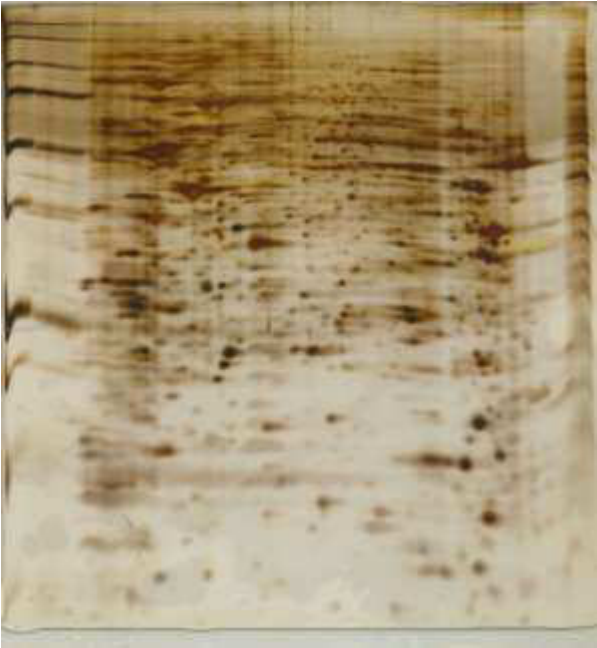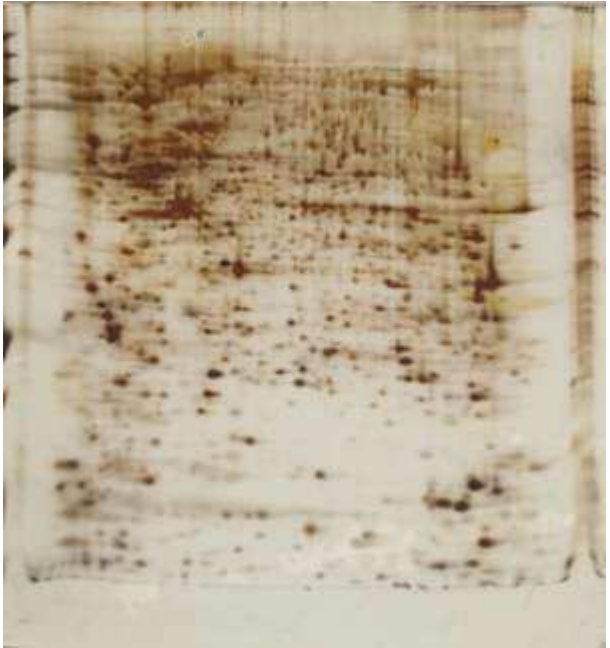

Jur kd 6-MP

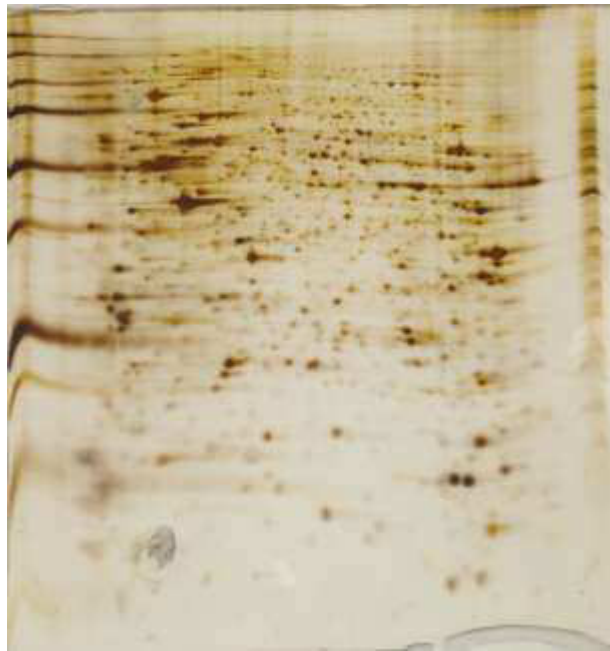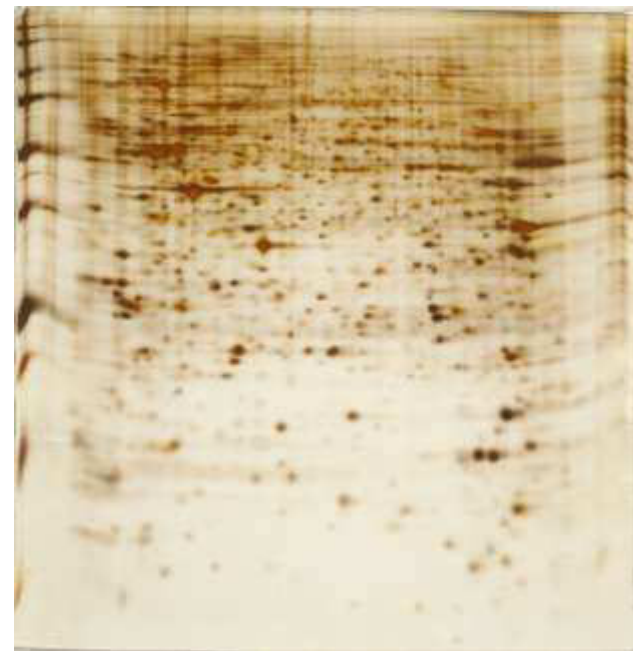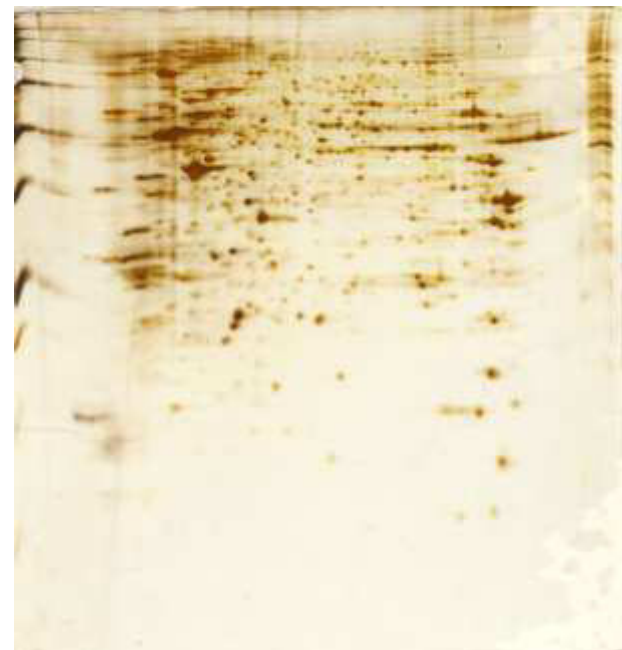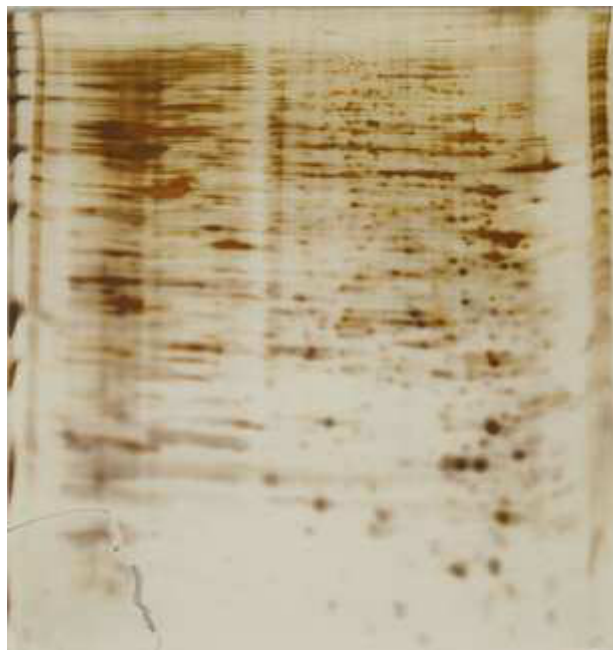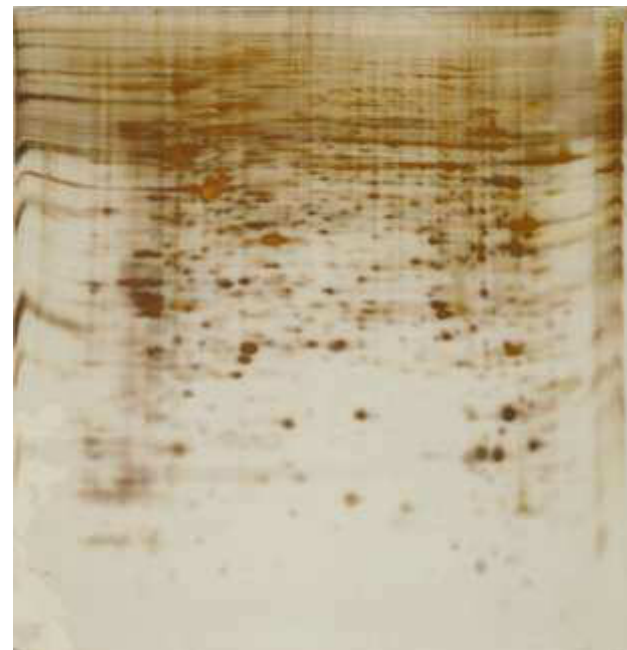

Jur kd 6-TG

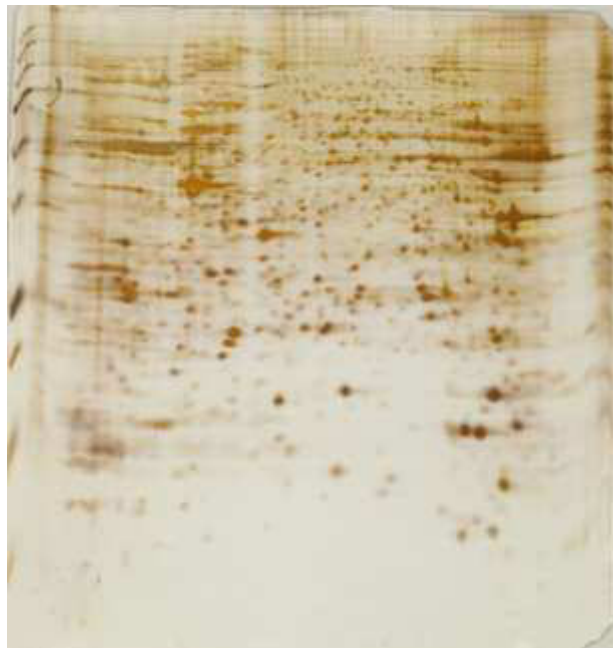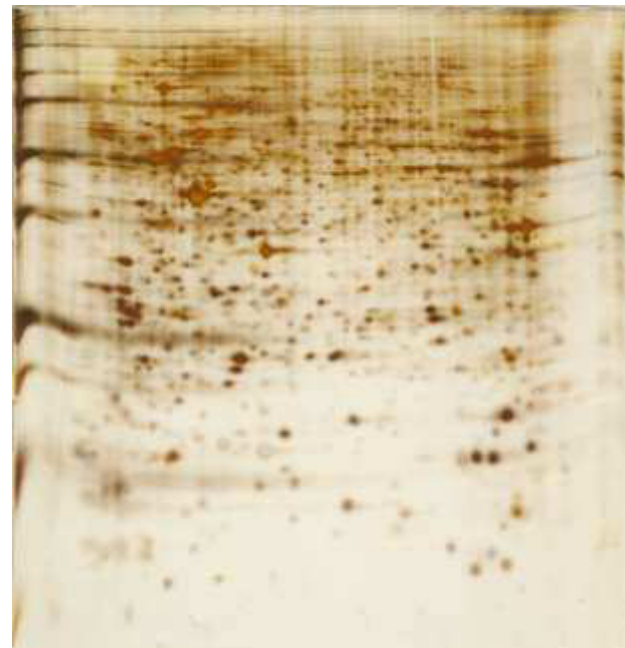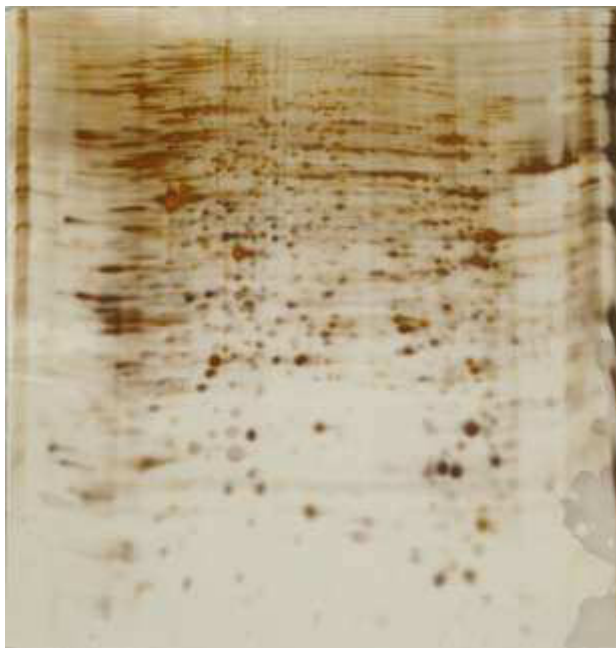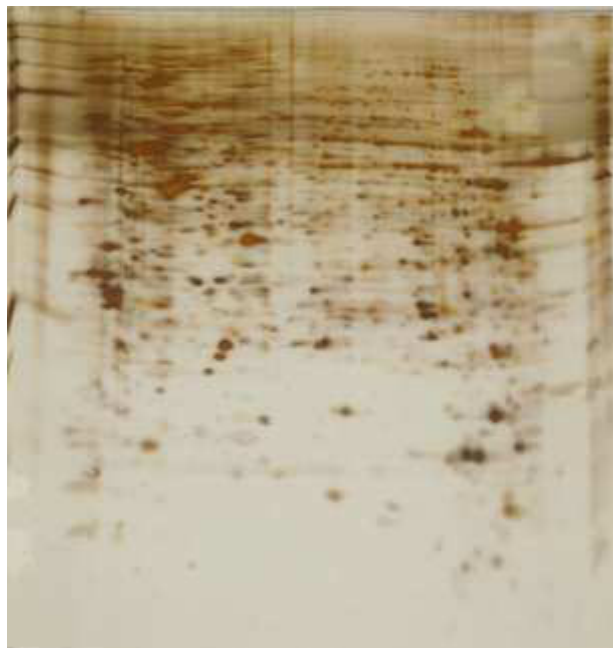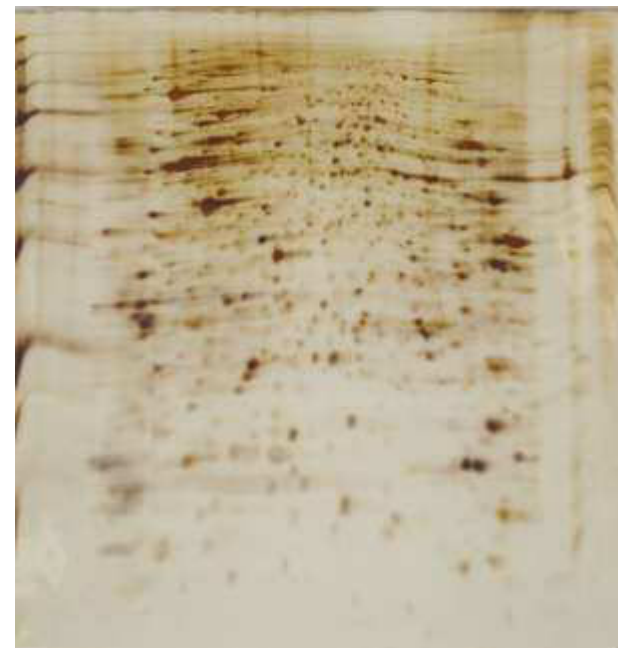

Suppl. Figure 1(b)

Jur wt DMSO

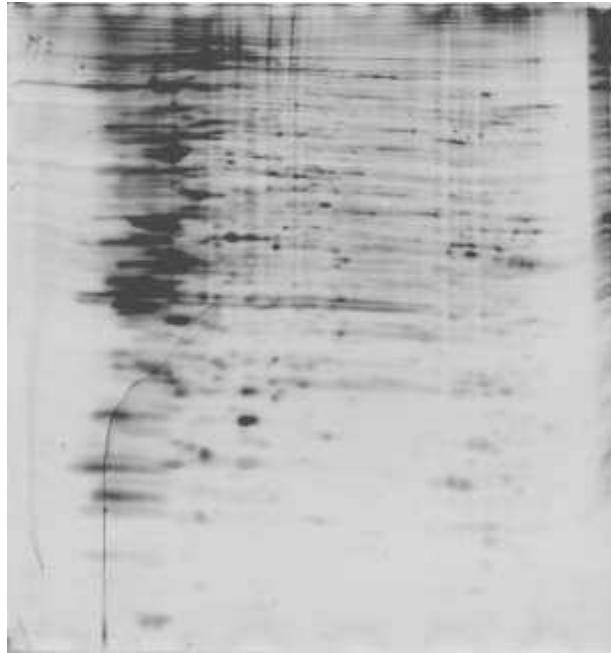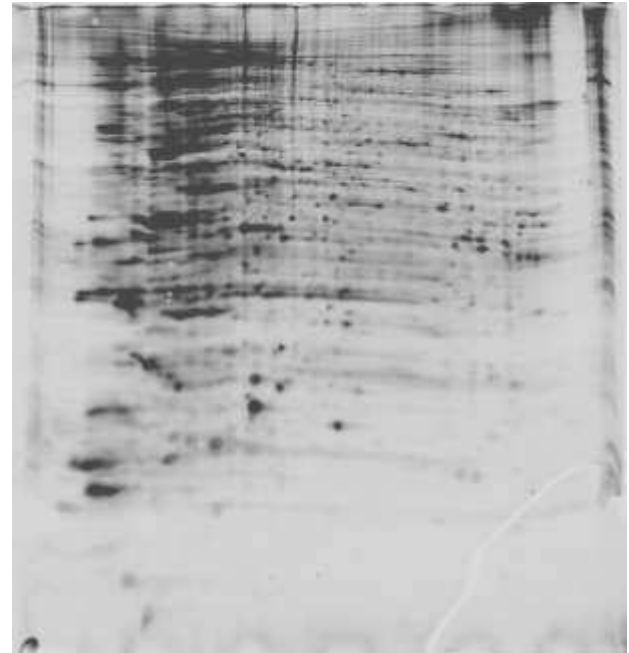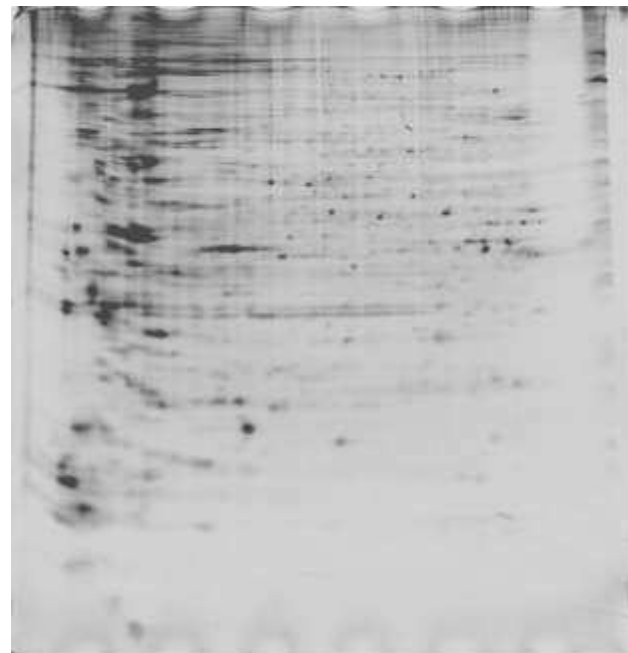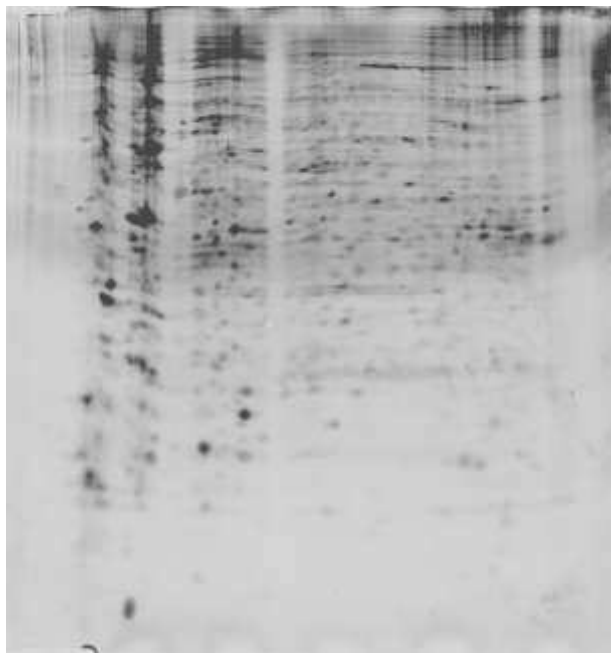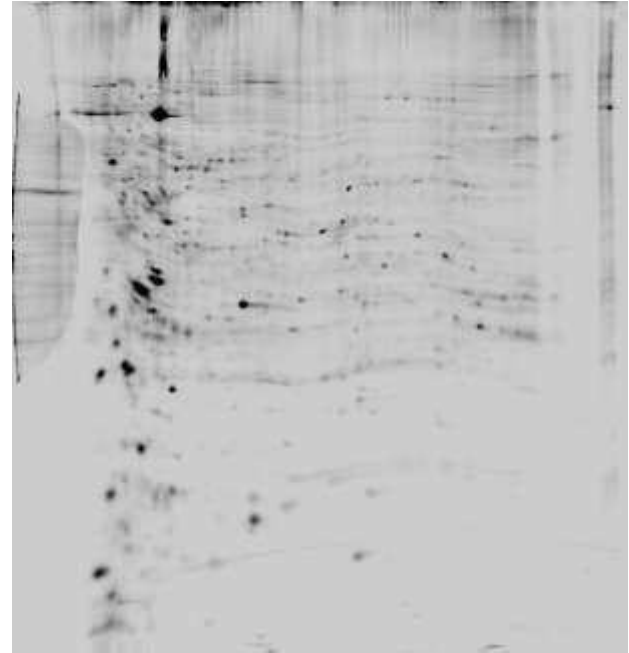

Jur wt 6-MP

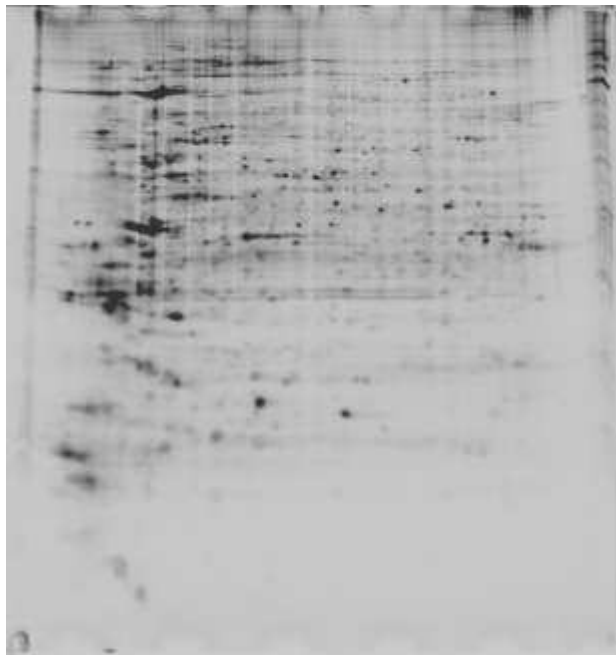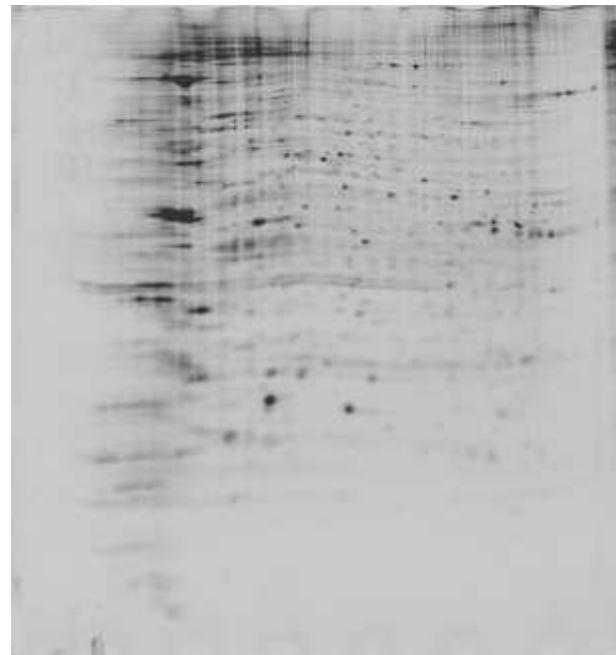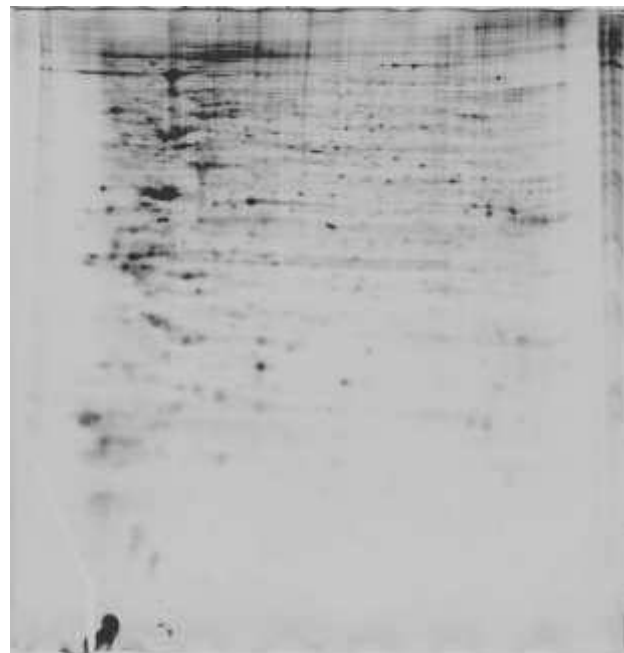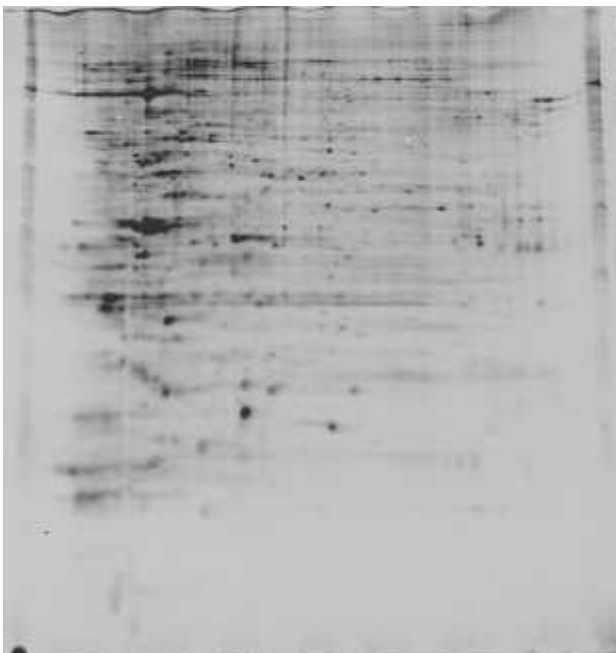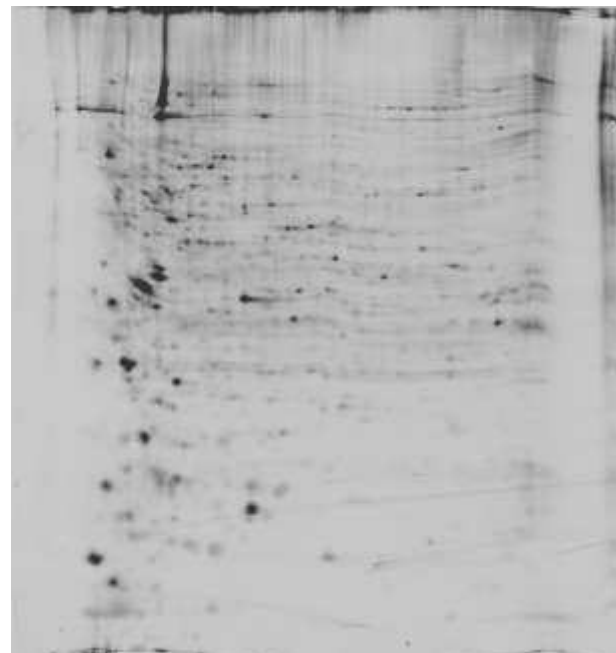



Jur wt 6-TG

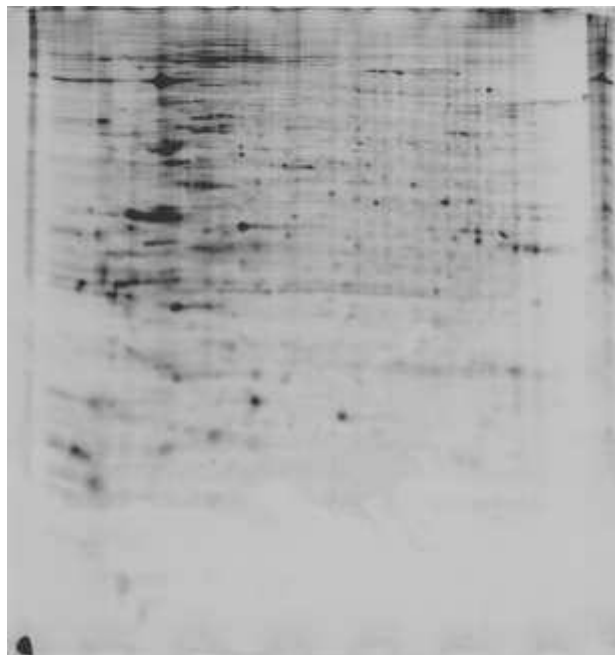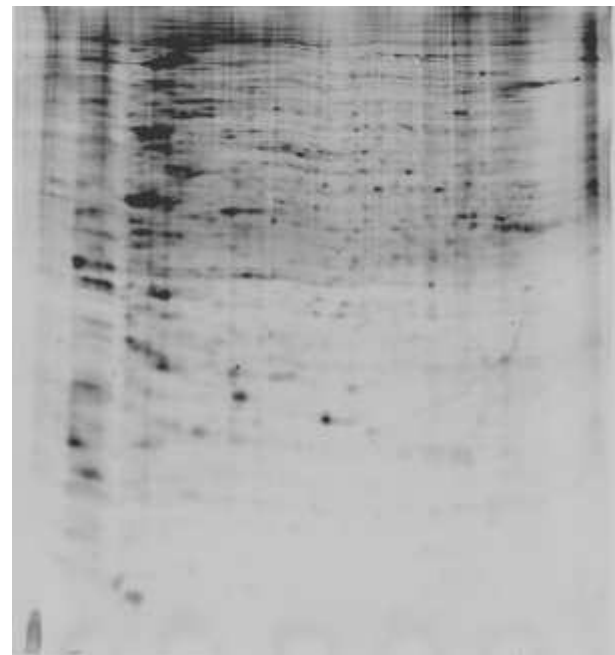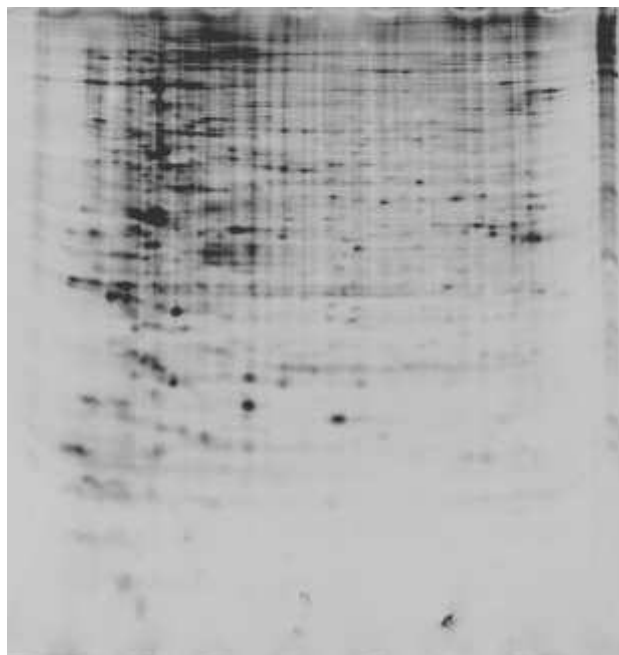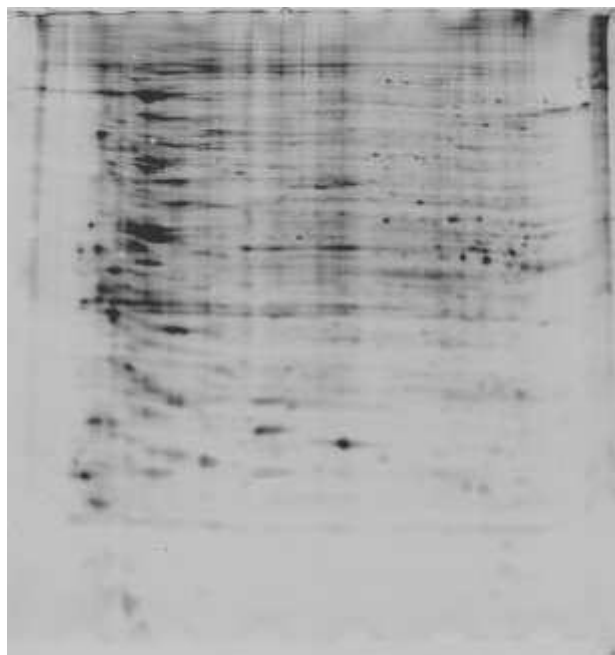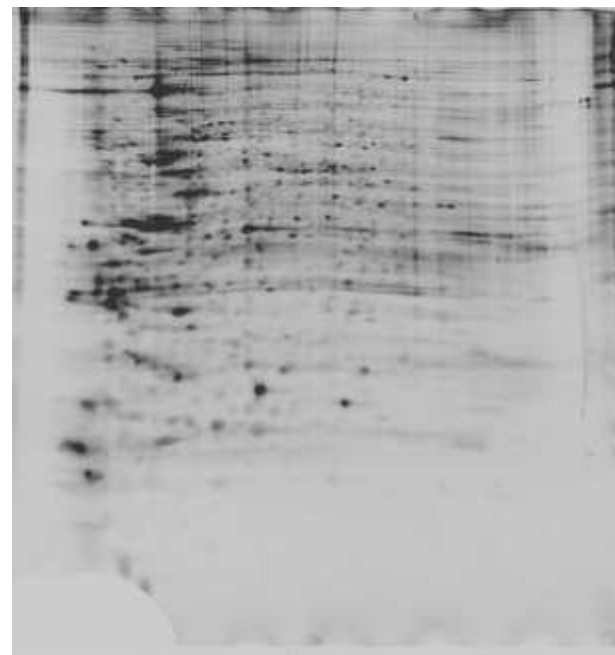

Jur kd DMSO

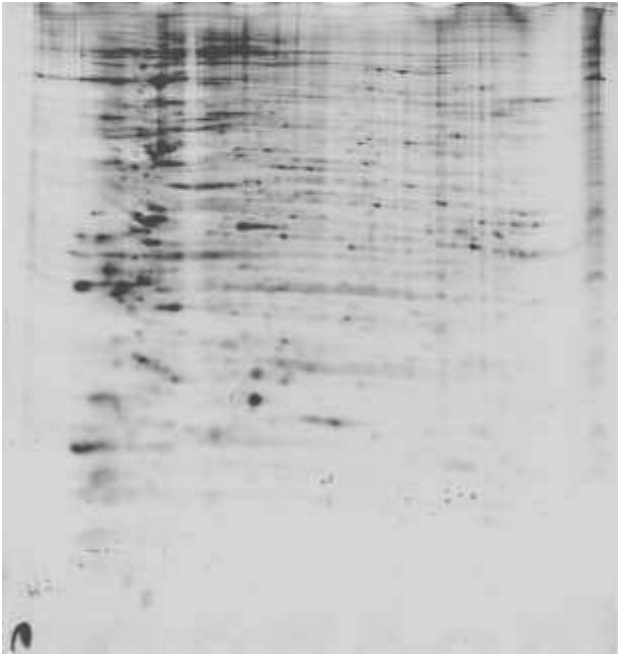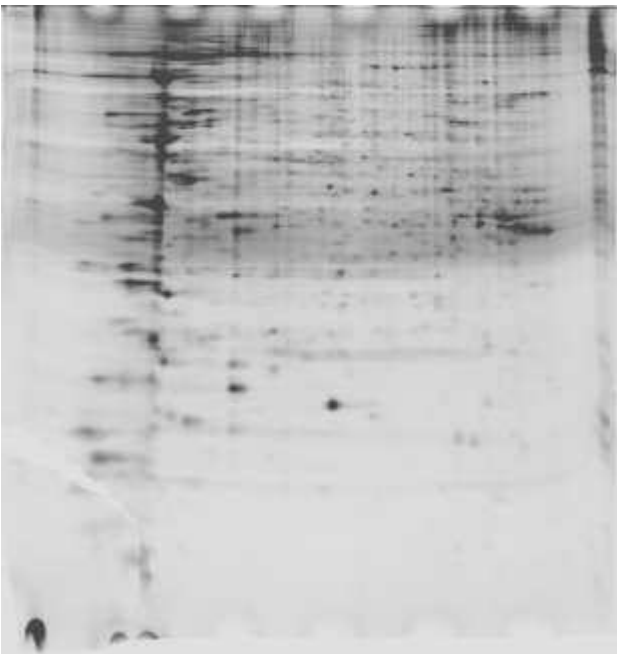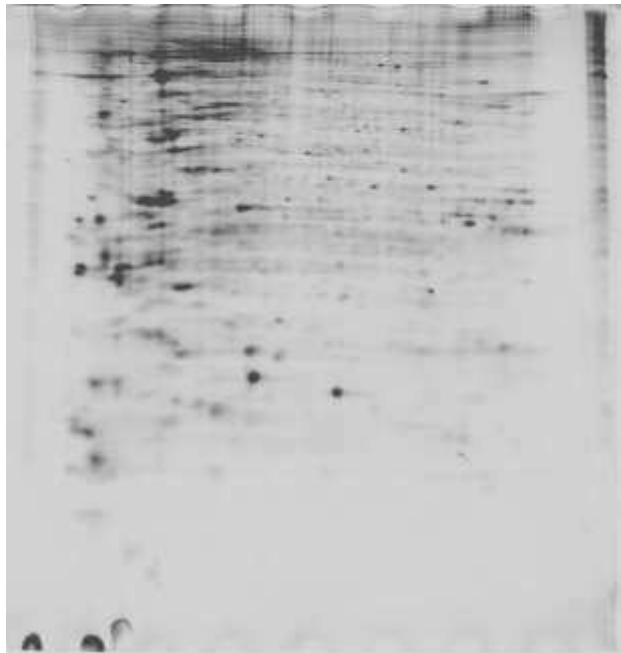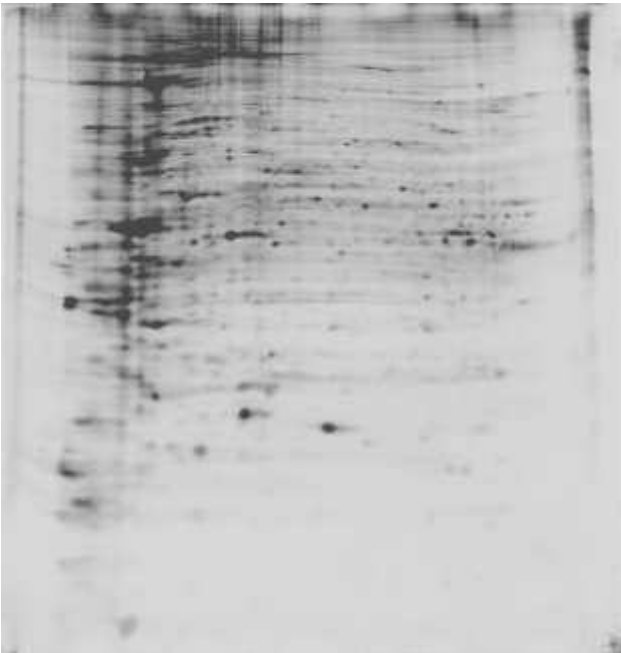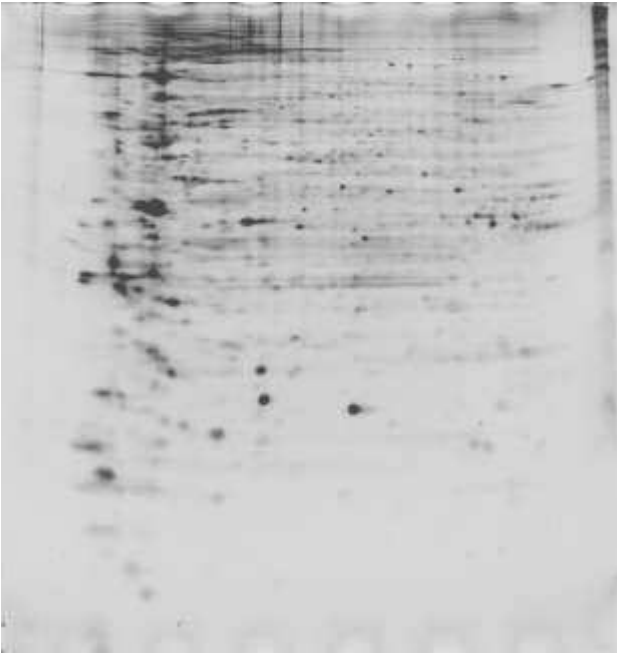

Jur kd 6-MP

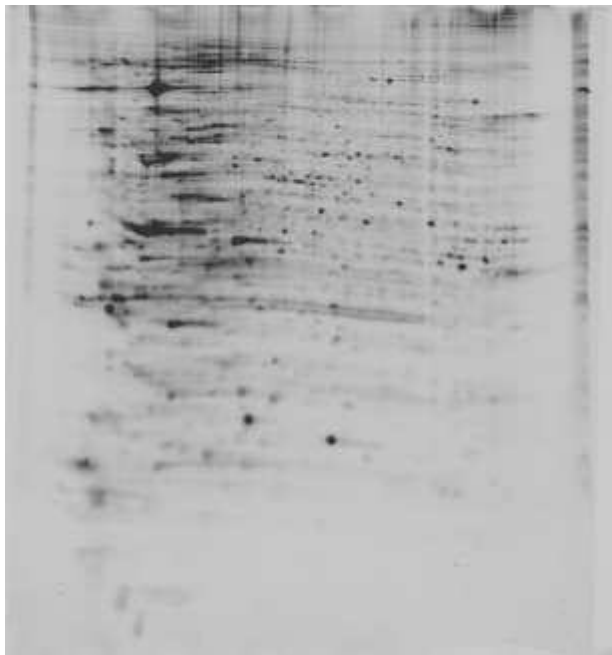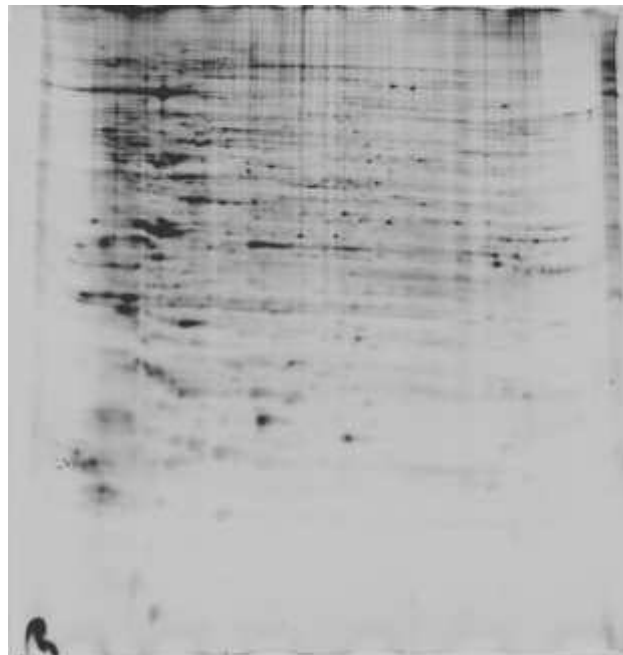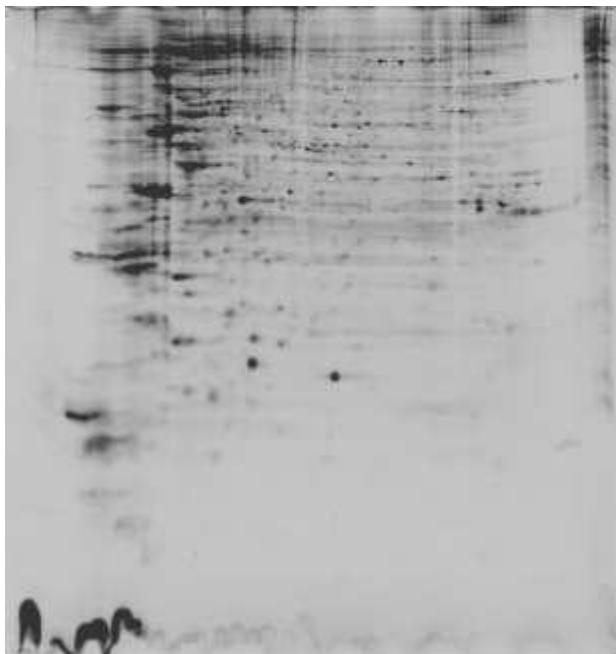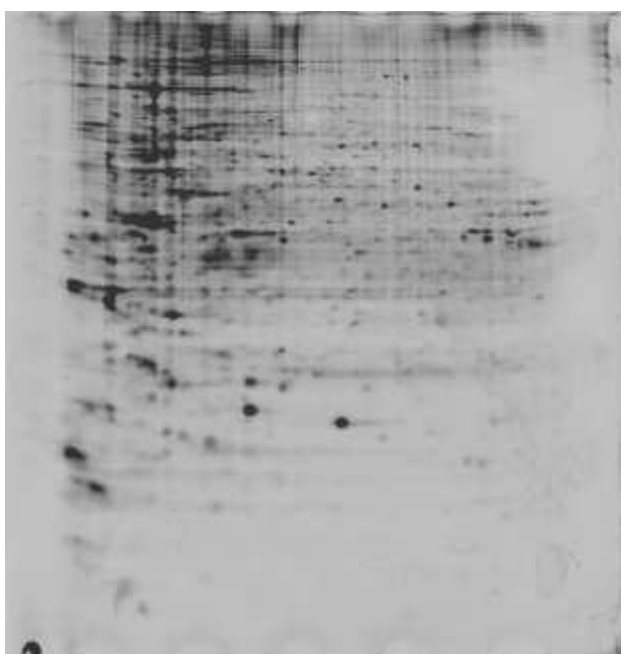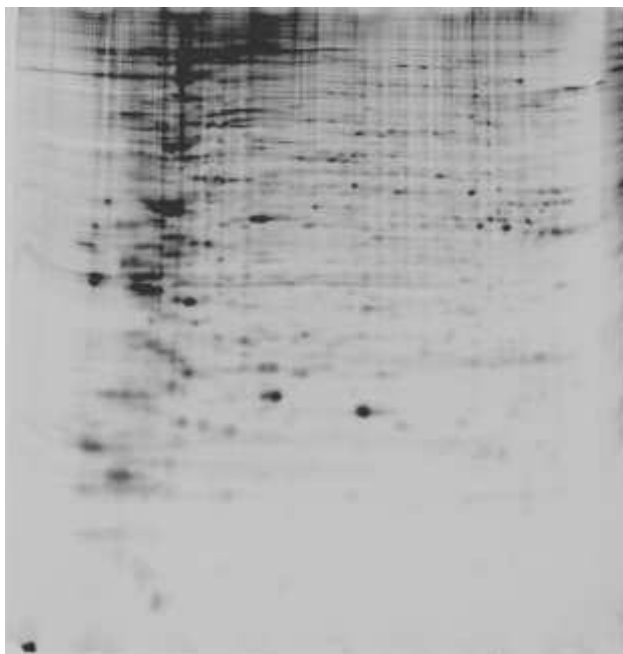

Jur kd 6-TG

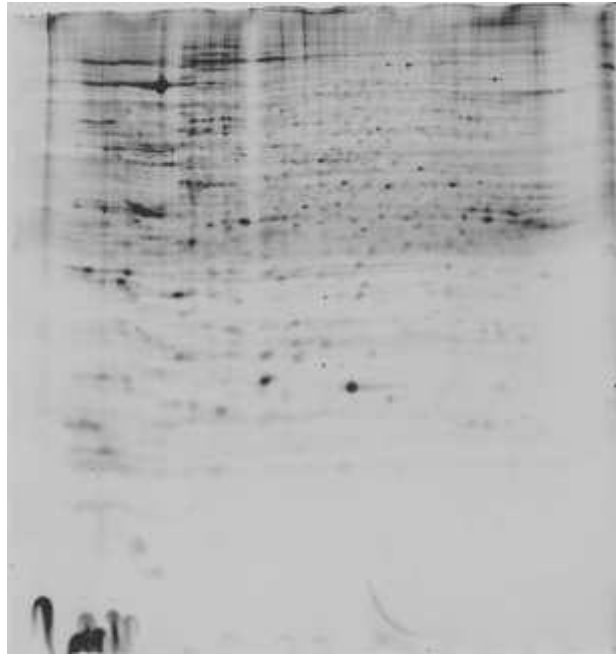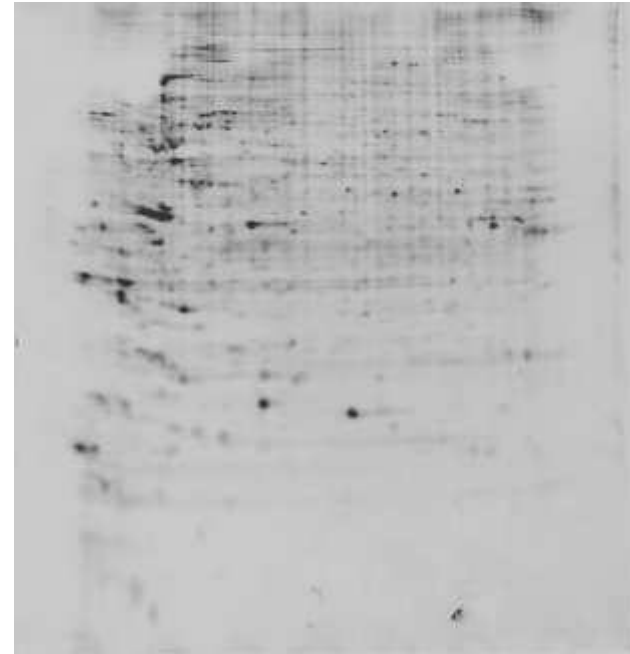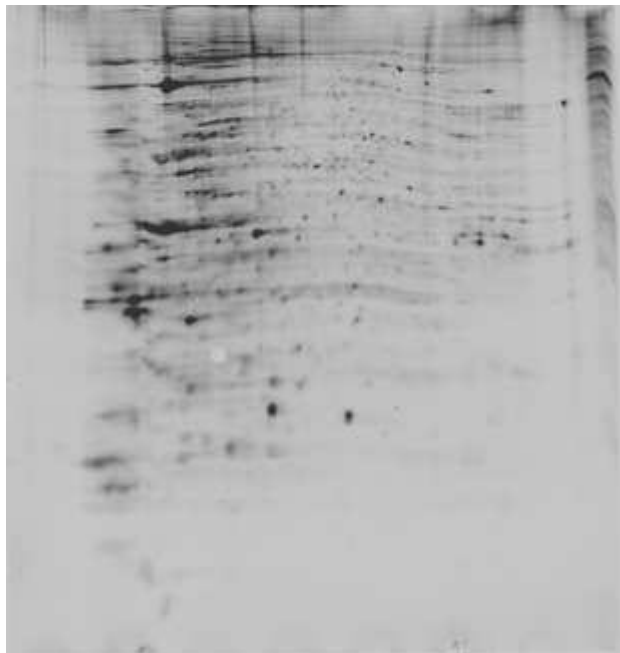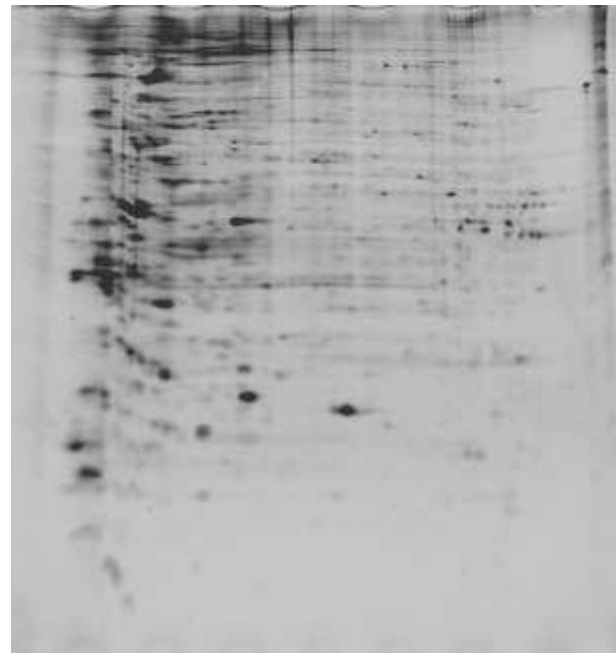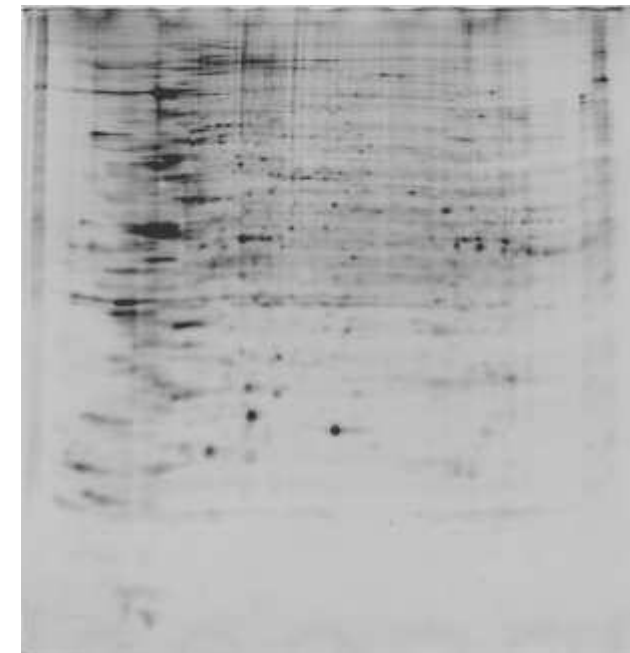

Suppl. Figure 2(a)

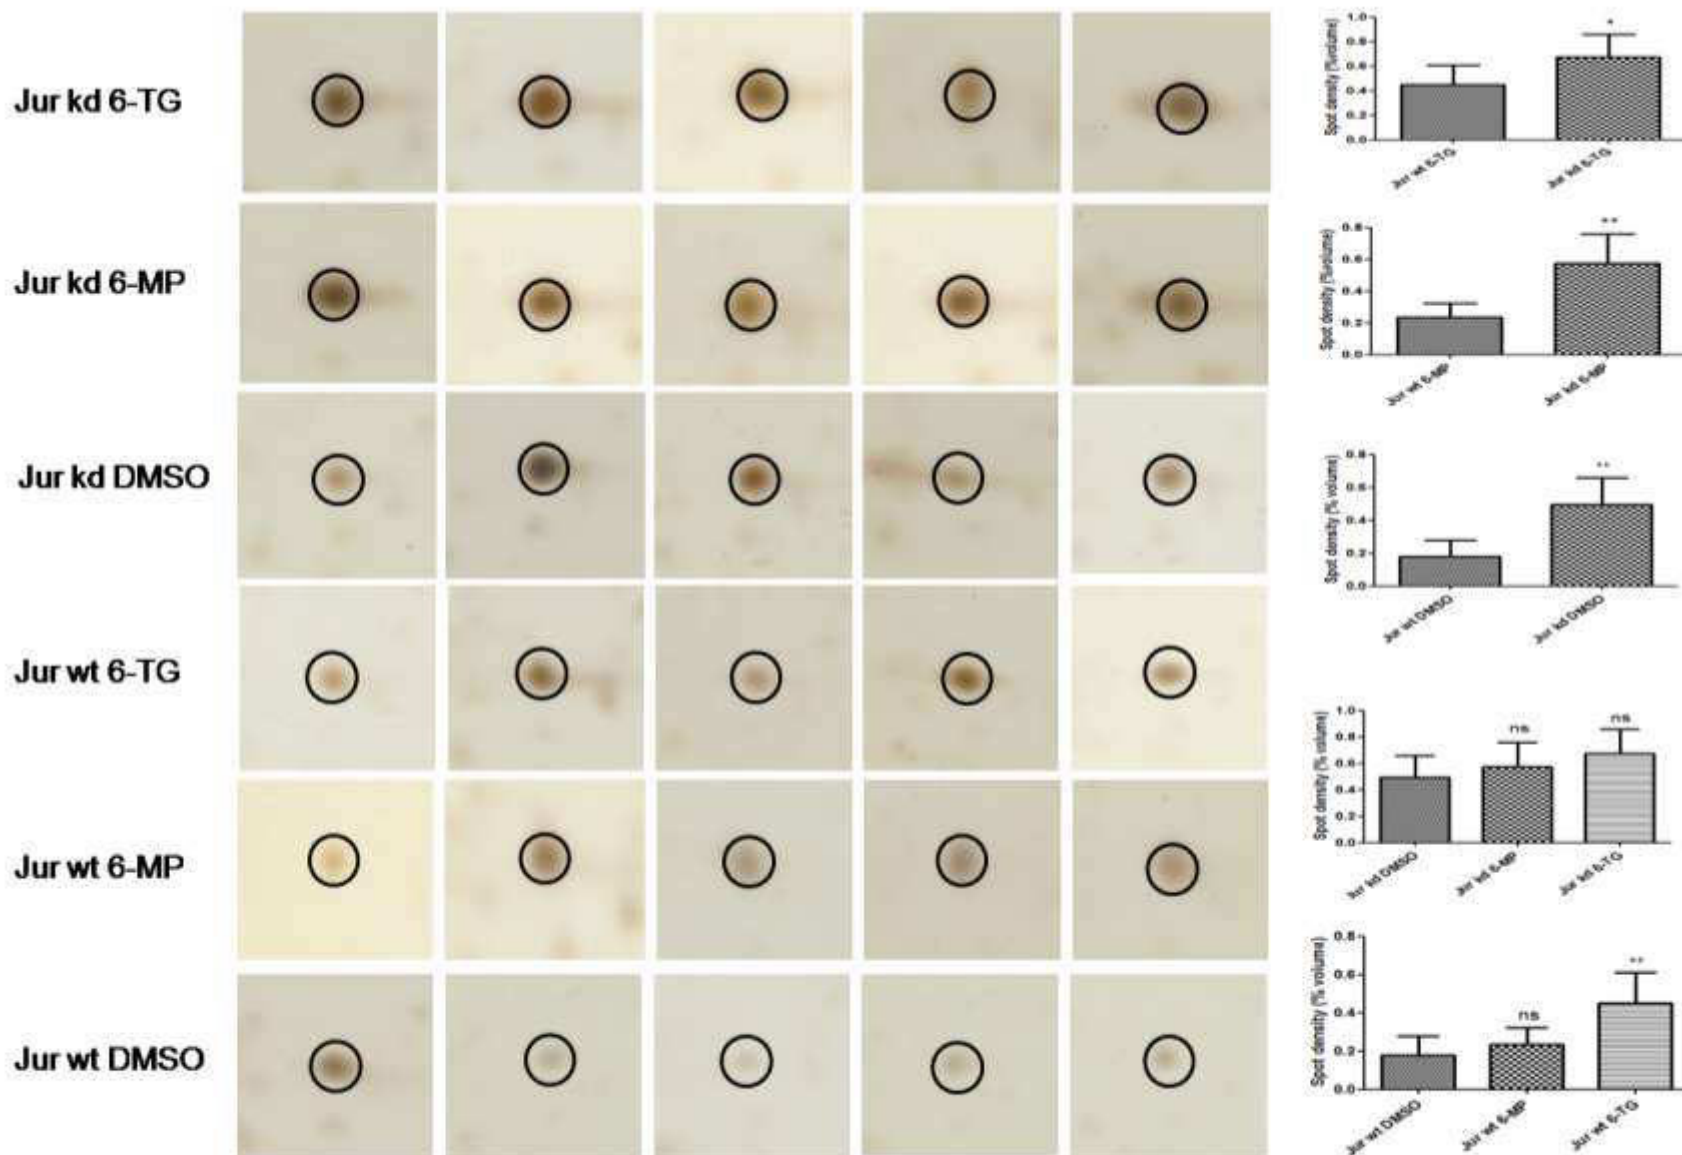

Suppl. Figure 2(b)

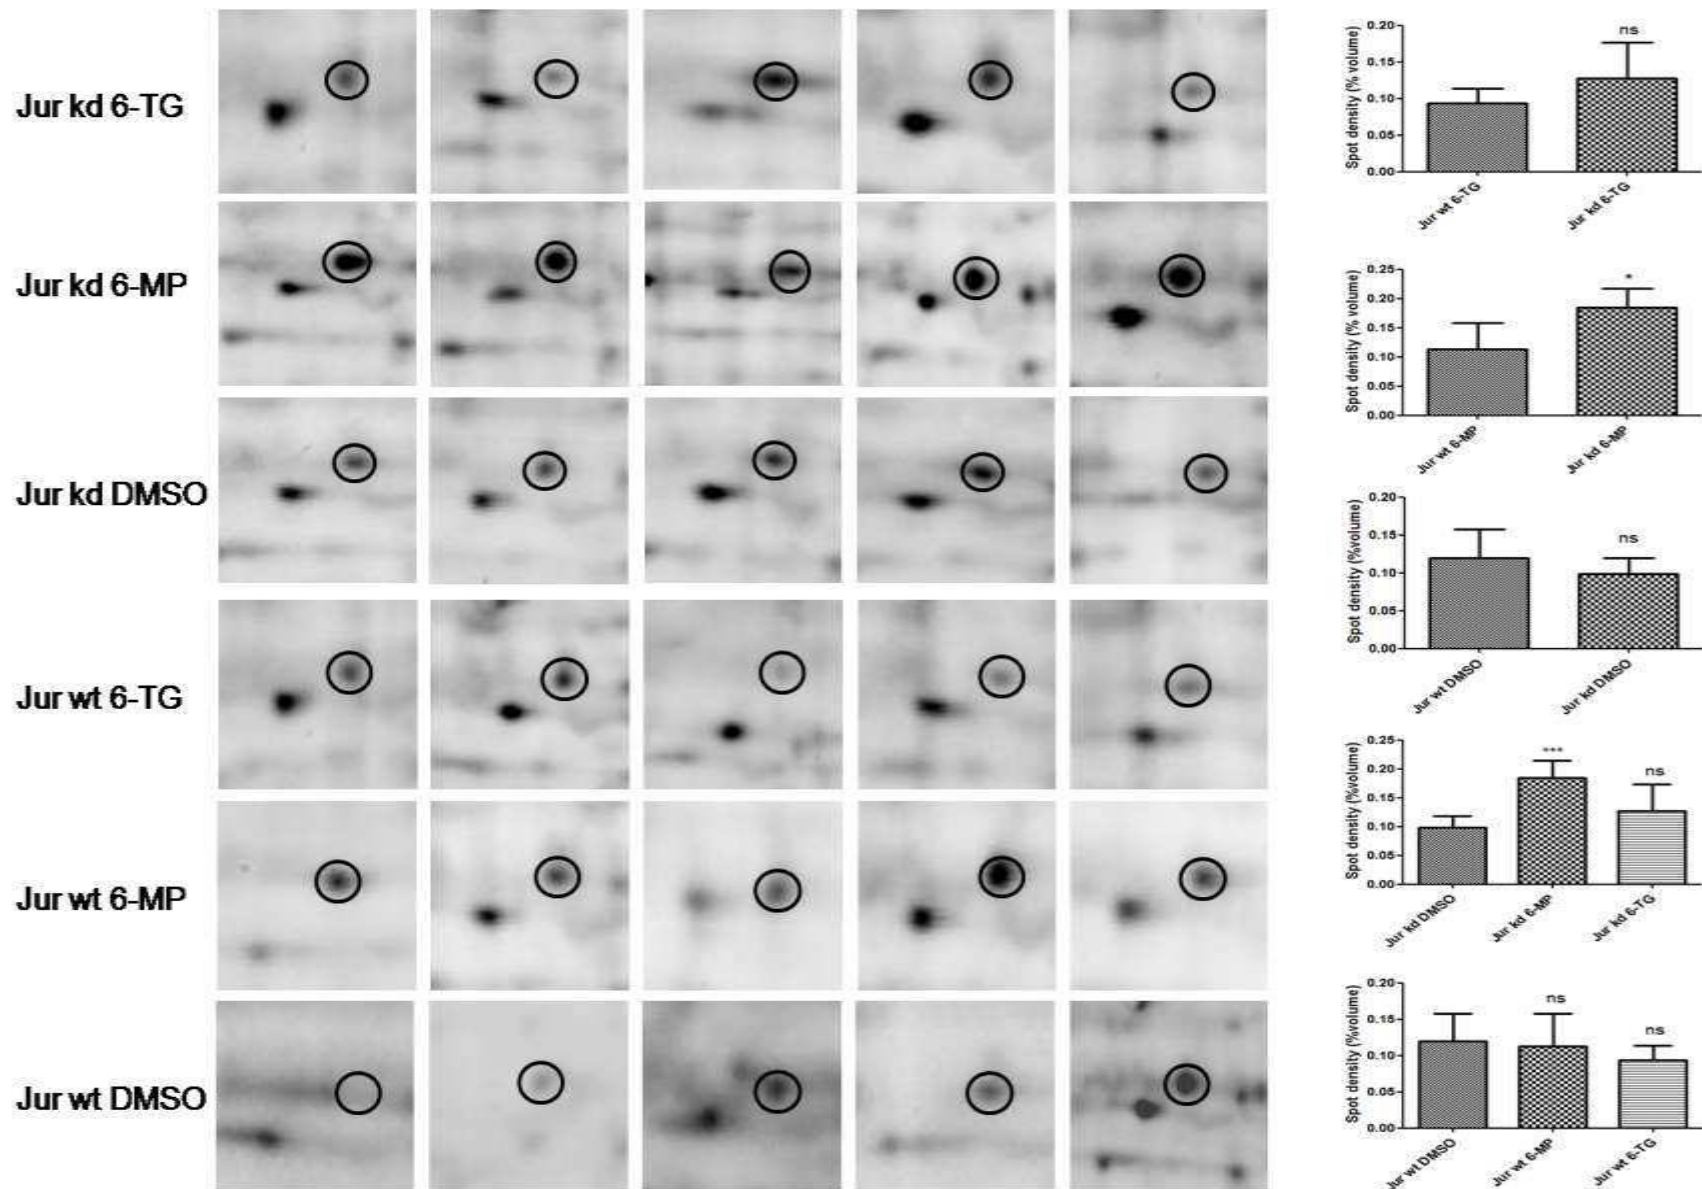

# Suppl. Figure 3

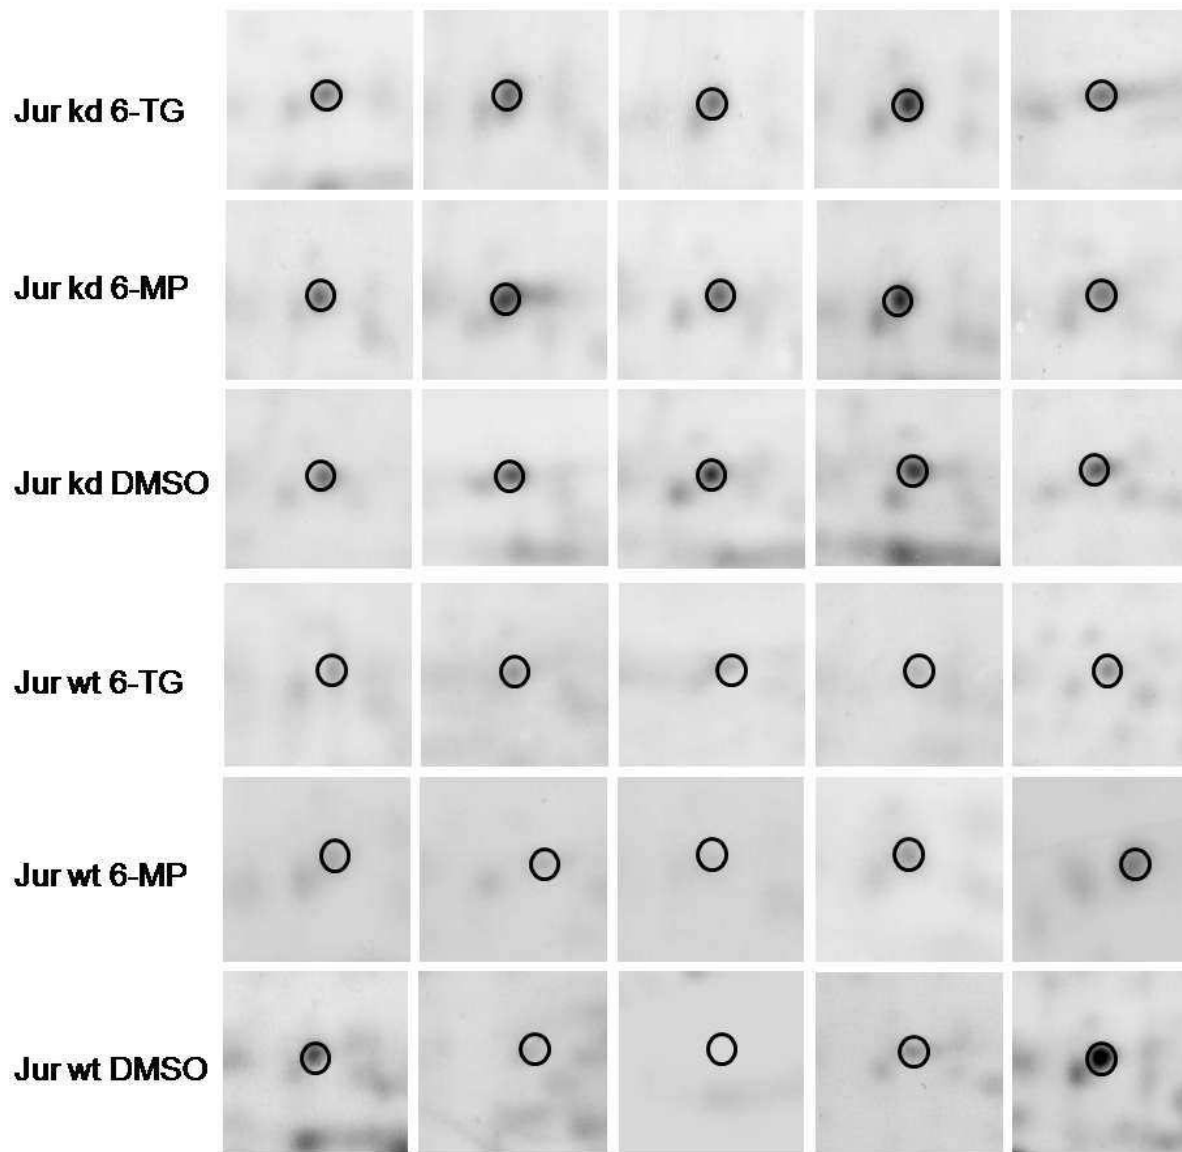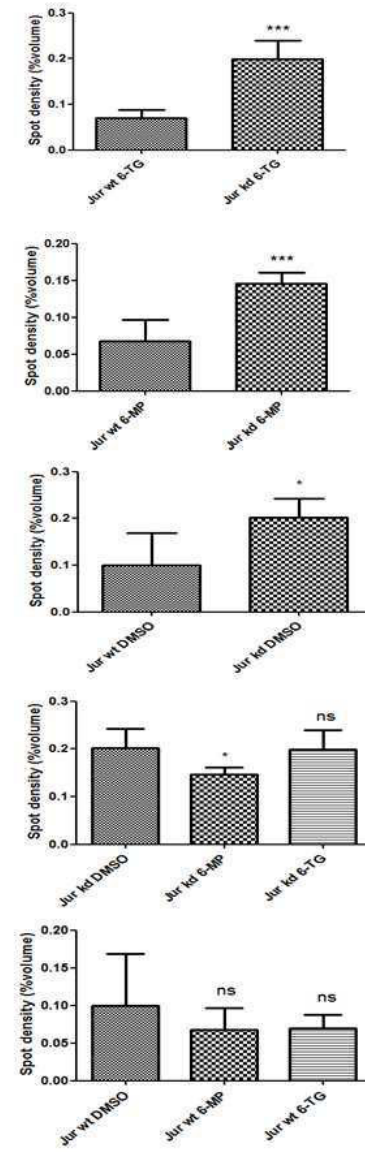

Suppl. Figure 4(a)

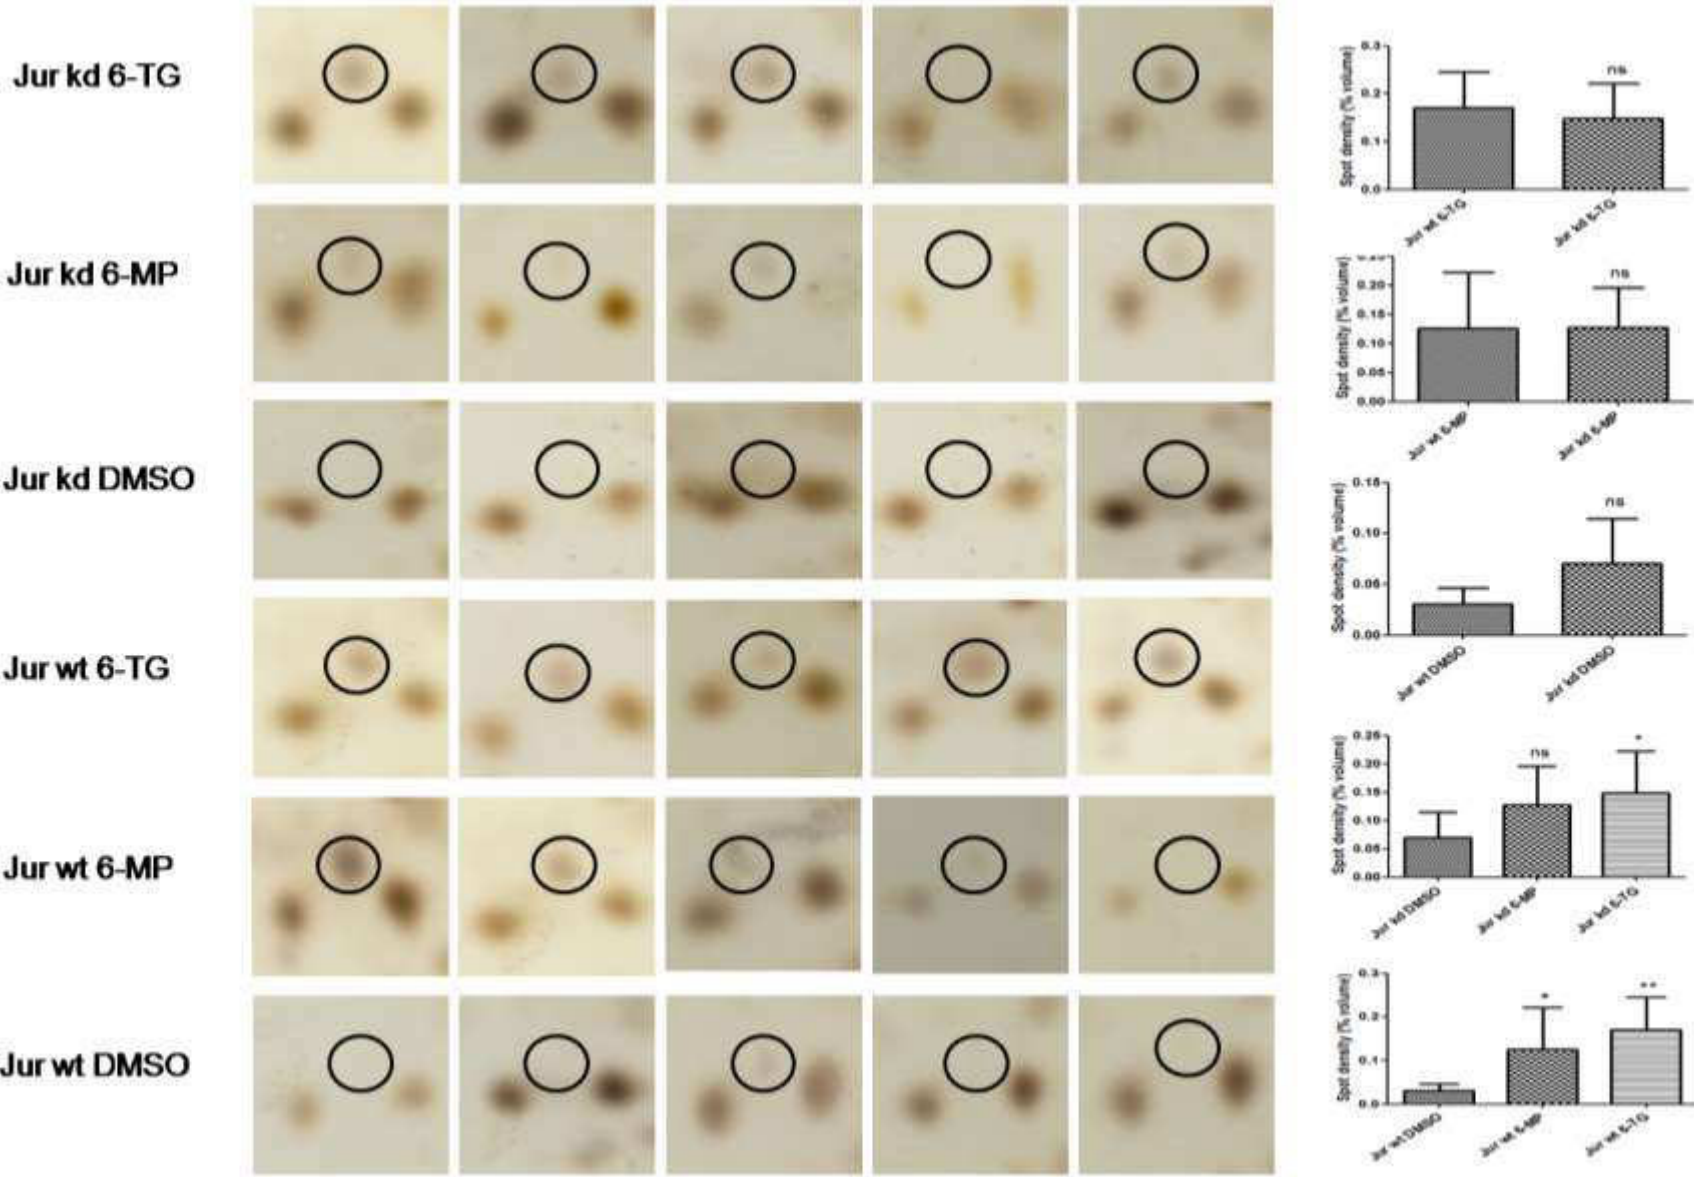



Suppl. Figure 4(b)

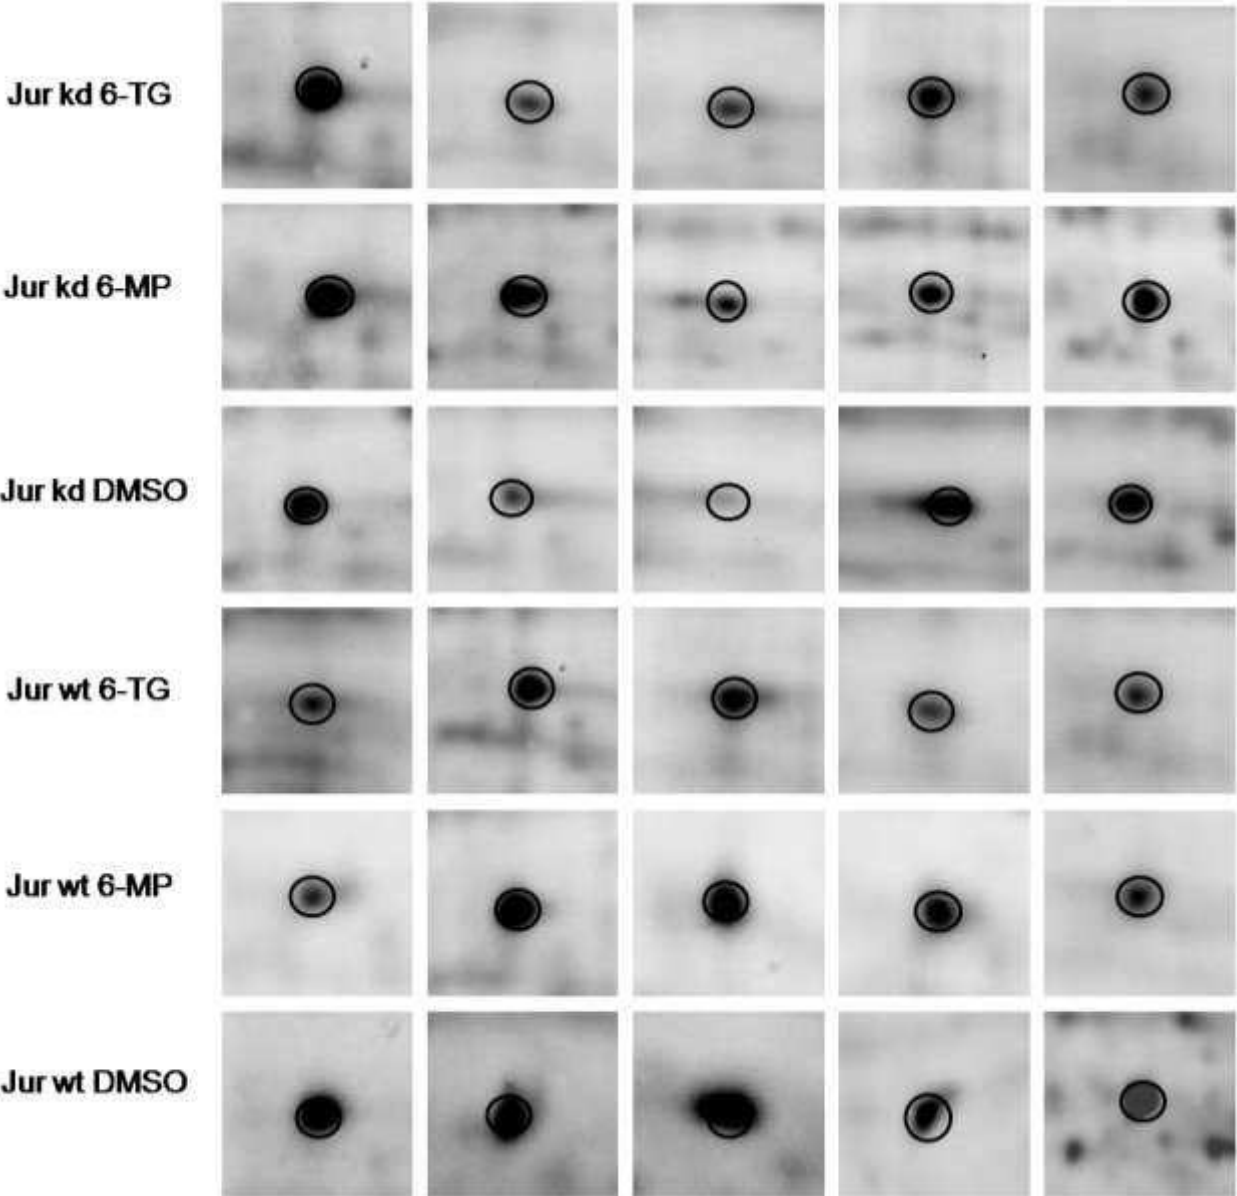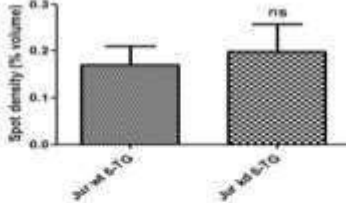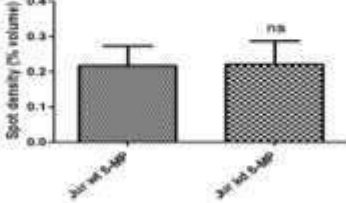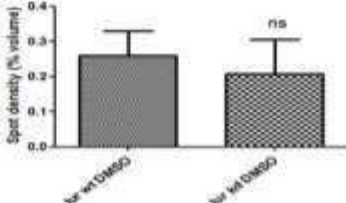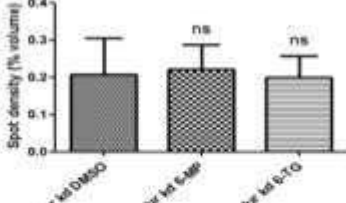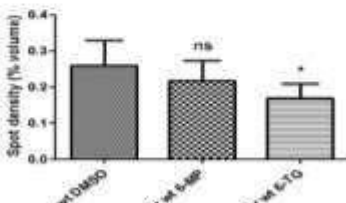

Suppl. Figure 5(a)

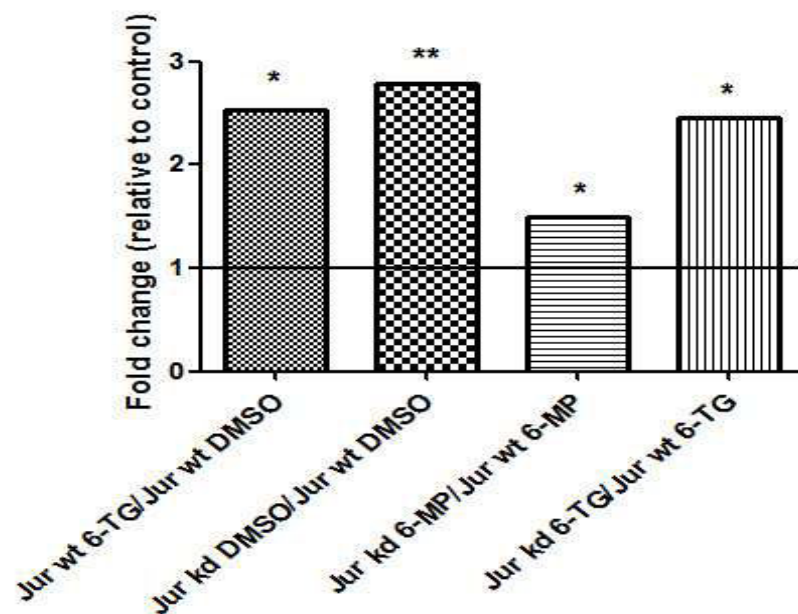

(b)

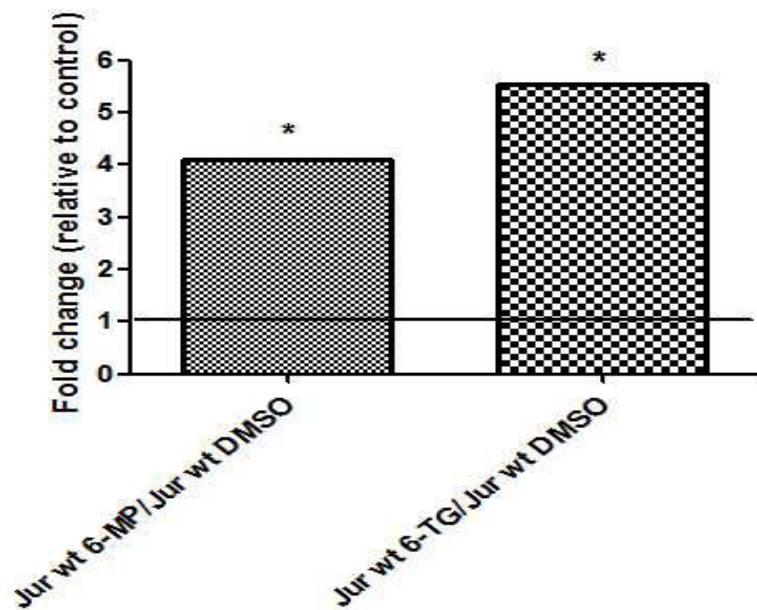

(c)

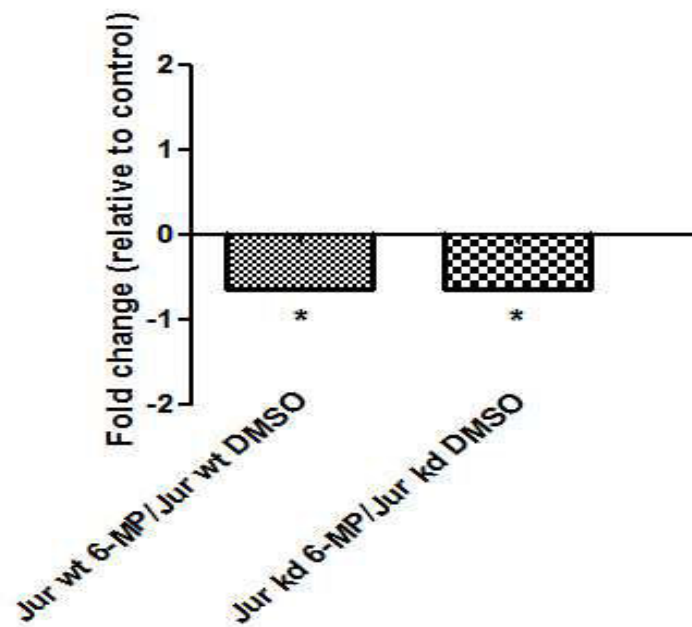

Suppl. Figure 6(a)

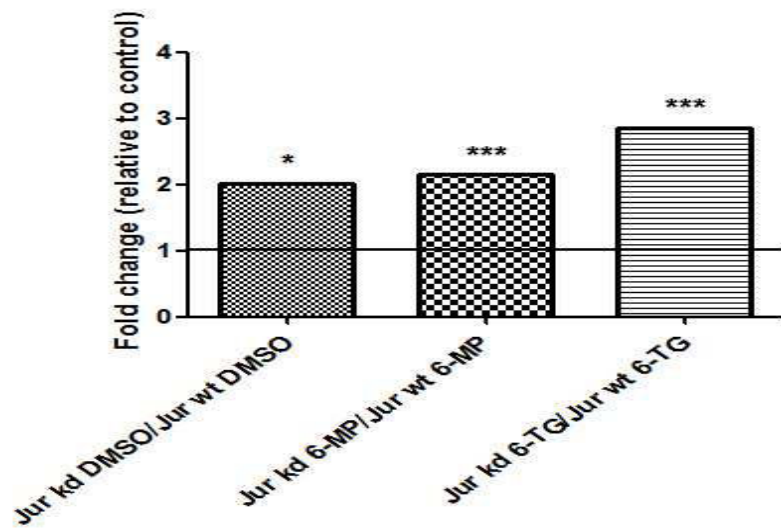

(b)

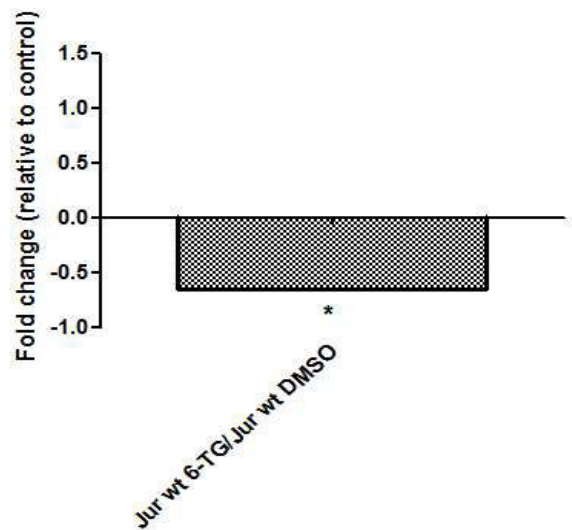

(c)

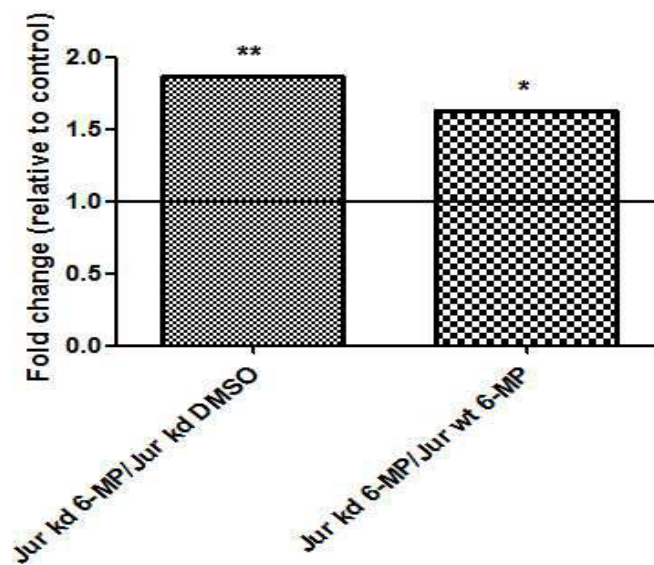

# Table S I: MS/MS analysis table for differentially regulated proteins identified by Q-TOF MS/MS analysis

**Footnotes:** <sup>1</sup>Mass 1 = Molecular mass of the protein observed in Mascot search. <sup>2</sup>Mascot score 2 = >40 indicate identification or extensive homology (p < 0.05). <sup>3</sup>Peptide matched 3= Number of peptides matched with protein in MS/MS query. <sup>4</sup>pl 4 = Isoelectric point of the protein observed in Mascot search.

| Spot no. | Acc. no. | Mass <sup>1</sup> (kDa) | pl <sup>4</sup> | Mascot Score <sup>2</sup> | Peptide matche d <sup>3</sup> | Sequence Coverage | Protein name | MS/MS Analysis                                                                                                                                                                                                                                                                                                                                                                                                                                                                                                                                                                                                                                                                                                                                                                                                                                                                                                                      |
|----------|----------|-------------------------|-----------------|---------------------------|-------------------------------|-------------------|--------------|-------------------------------------------------------------------------------------------------------------------------------------------------------------------------------------------------------------------------------------------------------------------------------------------------------------------------------------------------------------------------------------------------------------------------------------------------------------------------------------------------------------------------------------------------------------------------------------------------------------------------------------------------------------------------------------------------------------------------------------------------------------------------------------------------------------------------------------------------------------------------------------------------------------------------------------|
| 1        | Q9UBB4   | 53,5                    | 5,12            | 82                        | 3                             | 4%                | ATX10        | <p>1 MAAPRPPPAR LSGVMVPAPI QDLEALRALT ALFKEQRNRE TAPRTIFQRV<br/>                     51 LDILKKSSHA VELACRDPSQ VENLASSLQL ITECFRCLRN ACIECSVNQN<br/>                     101 SIRNLDTIGV AVDLILLFRE <b>LRVEQESLLT AFR</b>CGLQFLG NIASRNEDSQ<br/>                     151 SIVVWHAFPE LFLSCLNHPD KKIVAYSSMI LFTSLNHERM KELEENLNIA<br/>                     201 IDVIDAYQKH PESEWPFLII TDLFLKSPEL VQAMFPKLNN QERVTLDDLML<br/>                     251 IAKITSDEPL TKDDIPVFLR HAELIASTFV DQCKTVLKLA SEEPPDDEEA<br/>                     301 LATIRLLDVL CEMTVNTELL GYLQVFPGLL ERVIDLLRVI HVAGKETTNI<br/>                     351 FSNCGCVRAE GDISNVANGF KSHLIRLIGN LCYKNKDNQD KVNELDGIFL<br/>                     401 ILDNCSNDS NPFLTQWVIY AIRNLTEDNS <b>QNQDLIAKME EQGLADASLL</b><br/>                     451 <b>KKVGFVEVEKK</b> GEKLILKSTR DTPKP</p> 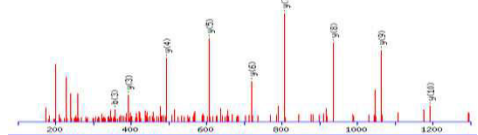 |
| 2        | Q9UFU4   | 36,9                    | 6,37            | 304                       | 9                             | 17%               | HNRH3        | <p>1 MDWVMK<b>HNGP NDASDGTVRL</b> RGLPFGCSKE EIVQFFQGLE IVPNGITLTM<br/>                     51 DYQGR<b>STGEA FVQFASKEIA</b> ENALGKHKER IGHRY<b>IEIFR</b> SSRSEIKGFY<br/>                     101 DPPRRLGQR PGYDRPIGG RGGYYGAGRG SMYDRMRGG DGYDGGYGGF<br/>                     151 DDYGGYNNYG YGNDGFDDRM RDGRGMGGHG YGAGDASSG FHGGHFVHMR<br/>                     201 GLPFR<b>ATEND IANFFSPLNP</b> IRVHIDIGAD GRATGEADVE FVTHEDAVAA<br/>                     251 MSKDKNMQH RYIELFLNST PGGSGMGGSG GMGGYGR<b>DGM DNQGGYGSV</b><br/>                     301 <b>RMGMGNYSYG</b> GYTPDGLGG YGRGGGSGGG YYGQGGMSGG GWRGMY</p>                                                                                                                                                                                                                          |
| 3        | Q13011   | 35,8                    | 8,16            | 174                       | 6                             | 14%               | ECH1         | <p>1 MAAGIVASRR LRDLLRRLT GSNYPGLSIS LRLTGSSAQE EASGVALGEA<br/>                     51 PDHSYESLRV TSAQKHLVHV QLNRPNKRNA MNKVFWREMV ECFNKISRDA<br/>                     101 DCRAVVISGA GKMFAGIDL MDMASDILQP KGDDVARISW YLRDIITRYQ<br/>                     151 ETFNVIERP KPVIAAVHGG CIGGGVDLVT ACDIR<b>YCAQD AFFQVKEVDV</b><br/>                     201 GLAADVGTQ RLPK<b>VIGNQS LVNELAFTAR</b> KMMADEALGS GLVSRVFPDK<br/>                     251 EVMLDAALAL AAIESSKSPV AVQSTK<b>VNLL YSR</b>DHSVAES LNYVASWNMS<br/>                     301 MLQTQDLVKS <b>VQATTENKEL</b> KTVTFSKL</p>                                                                                                                                                                                                                                                         |
| 4        | Q96Q81   | 26,7                    | 9,65            | 111                       | 4                             | 12%               | DUT          | <p>1 MTPLCRPRAL CYHFLTLLR SAMQNARGTA EGRSRGTLRA RPAPRPPAAQ<br/>                     51 HGIPRPLSSA GRLSQGCGRGA STVGAAGWK</p>                                                                                                                                                                                                                                                                                                                                                                                                                                                                                                                                                                                                                                                                                                                                                                                                         |

|    |        |      |      |     |    |     |                                                                                                                                                                                                                                                                                                                                                                                              |                                                                                                                                                                                                                                                                                                                                                                                    |
|----|--------|------|------|-----|----|-----|----------------------------------------------------------------------------------------------------------------------------------------------------------------------------------------------------------------------------------------------------------------------------------------------------------------------------------------------------------------------------------------------|------------------------------------------------------------------------------------------------------------------------------------------------------------------------------------------------------------------------------------------------------------------------------------------------------------------------------------------------------------------------------------|
|    |        |      |      |     |    |     | <p>ELPKAGGSPA PGPETPAISP<br/> <b>101</b> SKRARPAEVG GMQLRFAR<b>LS EHATAPTRGS</b><br/> ARAAGYDLYS AYDYTIIPME<br/> <b>151</b> KAVVK<b>TDIQI ALPSGCVGRV</b> APRSGLAAKH FIDVGAGVID<br/> EDYRGNVGVV<br/> <b>201</b> LFNFGKEKFE VKKGDR<b>IAQL ICER</b>IFYPEI EEVQALDDTE<br/> RSGGGFGSTG<br/> <b>251</b> KN</p> 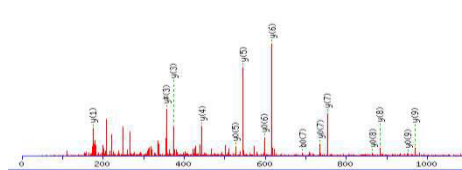 |                                                                                                                                                                                                                                                                                                                                                                                    |
| 5  | P23528 | 18,5 | 8,22 | 110 | 3  | 16% | COF1                                                                                                                                                                                                                                                                                                                                                                                         | <p><b>1</b> MASGVAVSDG VIKVFNDMKV RKSSTPEEVK KRKKAVLFCL<br/> SEDKKNILE<br/> <b>51</b> EGKEILVGDV GQTVDDPYAT FVKMLPKDKC<br/> <b>R</b>YALYD<b>A</b>T<b>Y</b>E <b>T</b>KESKKEDLV<br/> <b>101</b> FIFWAPESAP LKSKMIYASS KDAIKKLTG IKHELQANCY<br/> EEVKDRCTLA<br/> <b>151</b> EKLGGSAVIS LEGKPL</p>  |
| 6  | P16949 | 17,3 | 5,76 | 181 | 5  | 29% | STMN1                                                                                                                                                                                                                                                                                                                                                                                        | <p><b>1</b> MASDIQVKE LEKR<b>ASGQAF ELILSPRS</b>KE SVPEFPLSP<br/> KKK<b>DLSLEEI</b><br/> <b>51</b> <b>Q</b>KLKLEAAEER RKSHEAEVLK QLAEKREHEK EVLQK<b>AI</b>EEN<br/> <b>NNFSKMAEEK</b><br/> <b>101</b> LTHKMEANKE NREAQMAAKL ERLREKDKHI<br/> EEVRKN<b>KESK DPADETEAD</b></p>                     |
|    | Q9P1F3 | 9    | 5,86 | 43  | 2  | 27% | ABRAL                                                                                                                                                                                                                                                                                                                                                                                        | <p><b>1</b> MNVDHEVNLL VEEIHRIGSK NADGKLSVKF <b>GVLFRDDKCA</b><br/> <b>NLFEALVGTL</b><br/> <b>51</b> KAAKRRKIVT YPGELLQGV HDDVDIILL Q D</p>                                                                                                                                                   |
| 7  |        |      |      |     |    |     |                                                                                                                                                                                                                                                                                                                                                                                              | <p><b>1</b> MVKQIESK<b>T A</b>QEAL<b>DAAGD</b> KLVVVDFSAT WCGPCKMIKP<br/> FFHSLSEKYS<br/> <b>51</b> NVIFLEVDVD DCQDVASECE VK<b>CMPTFQFF</b><br/> <b>KGGOKVGEFS GANKEKLEAT</b><br/> <b>101</b> <b>INELV</b></p>                                                                                |
| 8  | P10599 | 11,7 | 4,82 | 244 | 10 | 40% | THIO                                                                                                                                                                                                                                                                                                                                                                                         | <p><b>1</b> MAGWNAVYDN LMADGTCQDA AIVGYKDSPS<br/> VWAAPGK<b>TF VNITPAEVGV</b><br/> <b>51</b> <b>LVGKDRSSFY</b> VNGLTLGGQK CSVIRDSLLQ<br/> DGEFSMDLRT <b>KSTGGAPTFN</b><br/> <b>101</b> <b>VTVTK</b>TDKTL VLLMGKEGVH GGLINKKCYE<br/> MASHLRSSQY</p>                                            |
| 9  | P07737 | 15   | 8,44 | 113 | 4  | 22% | PROF1                                                                                                                                                                                                                                                                                                                                                                                        | <p><b>1</b> MPMFIVNT<b>NV PR</b>ASVPDGLF SELTQQLAQA TGKPPQYIAV<br/> HVVPDQLMAF<br/> <b>51</b> GGSSEPCALC SLHSIGKIGG AQNRSYSK<b>LL CGLLAER</b>LRI<br/> SPDRVINY<br/> <b>101</b> DMNAANVGWN NSTFA</p>                                                                                                                                                                                |
| 10 | P14174 | 12,5 | 4,74 | 175 | 4  | 17% | MIF                                                                                                                                                                                                                                                                                                                                                                                          |                                                                                                                                                                                                                                                                                                                                                                                    |

|    |        |      |      |     |   |     |       |                                                                                                                                                                                                                                                                                                  |
|----|--------|------|------|-----|---|-----|-------|--------------------------------------------------------------------------------------------------------------------------------------------------------------------------------------------------------------------------------------------------------------------------------------------------|
|    |        |      |      |     |   |     |       | 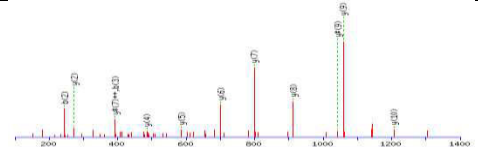                                                                                                                                                                                                              |
| 11 | P69905 | 15,2 | 8,72 | 31  | 2 | 6%  | HBA   | <p>1 MVLSPADKTN VKAAWGKVGVA HAGEYGAEAL<br/> ER<b>MFLSFP</b>TT KTYFPHFDLS<br/> 51 HGSAQVKGHG KKVADALNA VAHVDDMPNA<br/> LSALSDLHAH KLRVDPVNFK<br/> 101 LLSHCLLVTL AAHLPAEFTP AVHASLDKFL ASVSTVLTSK<br/> YR</p>  |
| 12 | Q9BRA2 | 13,9 | 5,4  | 187 | 5 | 15% | TXD17 | <p>1 MARYEEVSVS GFEEFHRAVE QHNGK<b>TIFAY FTGSK</b>DAGGK<br/> SWCPDCVQAE<br/> 51 PVVREGLKHI SEGCVFIYQC VGEKPYWKDP<br/> NNDFRKNLKV <b>TA</b>VP<b>TLL</b>KYG<br/> 101 TPQKLVESEC LQANLVEMLF SED</p>              |
| 13 | P58546 | 12,8 | 5,27 | 118 | 3 | 14% | MTPN  | <p>1 MCDKEFMWAL KNGDLDEVKD YVAKGEDVNR<br/> TLEGGRKPLH YAADCGQLEI<br/> 51 LEFLLKGD INAPDKHHIT PLLSAVYEGH VSCVKLLSK<br/> GADKTVK<b>GPD</b><br/> 101 <b>GLTAFEATDN QAI</b>KALLQ</p>                            |

**Table S II: MS/MS analysis table for differentially regulated phospho proteins identified by Q-TOF MS/MS analysis**

**Footnotes:** <sup>1</sup>Mass 1 = Molecular mass of the protein observed in Mascot search. <sup>2</sup>Mascot score 2 = >40 indicate identification or extensive homology (p < 0.05). <sup>3</sup>Peptide matched 3= Number of peptides matched with protein in MS/MS query. <sup>4</sup>pI 4 = Isoelectric point of the protein observed in Mascot search.

| Spot no. | Acc. no. | Mass <sup>1</sup> (kDa) | pI <sup>4</sup> | Mascot Score <sup>2</sup> | Peptide matched <sup>3</sup> | Sequence Coverage | Protein name | MS/MS Analysis                                                                                                                                                                                                                                                                                                                                                                                                                                                                                                                                                                                                                                                                                                                                                                                                                                                                                                                                                                                                                                                                                                                                                                                                                                                                                                                                                                                                                                                                                                          |
|----------|----------|-------------------------|-----------------|---------------------------|------------------------------|-------------------|--------------|-------------------------------------------------------------------------------------------------------------------------------------------------------------------------------------------------------------------------------------------------------------------------------------------------------------------------------------------------------------------------------------------------------------------------------------------------------------------------------------------------------------------------------------------------------------------------------------------------------------------------------------------------------------------------------------------------------------------------------------------------------------------------------------------------------------------------------------------------------------------------------------------------------------------------------------------------------------------------------------------------------------------------------------------------------------------------------------------------------------------------------------------------------------------------------------------------------------------------------------------------------------------------------------------------------------------------------------------------------------------------------------------------------------------------------------------------------------------------------------------------------------------------|
| 1        | Q01813   | 85,5                    | 7,50            | 184                       | 11                           | 11%               | K6PP         | <p>1 MDADDSRAPK GSLRKFLEHL SGAGKAIGVL TSGGDAQGMN AAVRAVVRMG<br/>                     51 IYVGAKVYFI YEGYQGMVDG GSNIAEADWE SVSSILQVGG TIIGSARCQA<br/>                     101 FRTREGRLKA ACNLLQRGIT NLCVIGGDGS LTGANLFRKE <b>WSGLEELAR</b><br/>                     151 NGQIDKEAVQ KYAYLNVVGM VGSIDNDFCG TDMTIGTDSA <b>LHRIIEVDA</b><br/>                     201 <b>IMTTAQSHQR TFVLEVMGRH</b> CGYLALVSAL ACGADWVFLP ESPPEEGWEE<br/>                     251 QMCVKLSENR ARKKRLNIII VAEGAIDTQN KPITSEKIKE <b>LVTQLGYDT</b><br/>                     301 <b>RVTILGHVQR</b> GGTPSAFDRI LASRMGVEAV IALLEATPDT PACVVS LNNG<br/>                     351 HAVRLPLMEC VQMTQDVQKA MDER<b>RFQDAV</b> <b>RLRGRSFAGN</b> LNTYKRLAIK<br/>                     401 LPDDQIPKTN CNVAVINVGA PAAGMNAAVR SAVRVGIADG <b>HRMLAIYDGF</b><br/>                     451 <b>DGFAK</b>GQIKE IGWTDVGGWT GQGGSILGTK RVLPGKYLEE IATQMRTHSI<br/>                     501 NALLIIGFFE AYLGLELSA AREKHFEFCV PMVMVPATVS NNVPGSDFSI<br/>                     551 GADTALNTIT DTCDRIKQSA SGTKRRVFI EITMGGYCGYL ANMGGLAAGA<br/>                     601 DAAYIFEFP DIRDL<b>QSNVE HLTEK</b>MKTTI QRGLVLRNES CSENYTDFI<br/>                     651 YQLYSEEGKG VFDCKRNLVG HMQQGGAPSP FDRNFGTKIS ARAMEWITAK<br/>                     701 LKEARGRGKK <b>FTTDDSCIVL GISKRNIVFO PVAELKKQTD</b> FEHRIPKEQW<br/>                     751 WLKLRPLMKI LAKYKASYDV SDSGQLEHVQ PWSV</p>  |
| 2        | P40227   | 58                      | 6,23            | 366                       | 12                           | 21%               | TCPZ         | <p>1 MAAVKTLNPK AEVAR<b>AQAAL AVNISAARGL QDVLRTNLGP</b> KGTMK<b>MLVSG</b><br/>                     51 <b>AGDIK</b>LTKDG NVLLHEMIQI HPTASLIQV ATAQDDITGD GTTNSVLIIG<br/>                     101 ELLKQADLYI SEGLHPR<b>IIT EGFEEAKEKA LQFLEEVKVS</b> REMDRETLID<br/>                     151 VARTSLRQV HAELADVLTE AVVDSILAIA KQDEPIDLFM IEIMEMKHKS<br/>                     201 ETDTSIRLRL VLDHGARHPD MKKRVEDAYI LTCNVSLEYE <b>KTEVNSGFFY</b><br/>                     251 <b>KSAEEREKLV</b> KAERKFIEDR VKKIIELEKRV VCGSDSKGFV VINQK<b>IDPF</b><br/>                     301 <b>SLDALSKEGI VALR</b>AKRRR MERLTLACGG VALNSFDDLS PDCLGHAGLV<br/>                     351 YEYTLGEEKF TFIKCNPNR SVTLIKGPN KHTLTQIKDA VRDGLRAVKN<br/>                     401 AIDGCVVPG AGAVEVAMAE ALIKHKPSVK GR<b>AQLGVQAF ADALLIIPKV</b><br/>                     451 <b>LAQNSGFDLQ ETLVK</b>IAEHS ESEGQLVGD LNTGEMVAA EVGVDNYCV<br/>                     501 KKQLHSCVT IATNILLVDE IMRAGMSSLK G</p>                                                                                                                                                                                                                                                                                                                                                                                                                                                     |
| 3        | P31146   | 51                      | 6,25            | 131                       | 6                            | 10%               | COR1A        | <p>1 MSRQVVRSSK <b>FRHVFGQPAK</b> ADQCYEDVRV <b>SQTTWDSGFC AVNPKFVALI</b><br/>                     51 <b>CEASGGGAFV LPLGK</b>TGRV DKNAPTVCGH TAPVLDIAWC PHNDNVIASG<br/>                     101 SEDCTVMVWE IPDGGLMLPL REPVVTLEGH TKRVGIVAWH TTAQNVLLSA<br/>                     151 GCDNVIMVWD VGTGAAMLTL GPEVHPDTIY SVDWSDGGL ICTSCRDKRV<br/>                     201 RIIEPRKGTV VAEKDRPHEG TRPV<b>AVFVS EGKILTTGFS RMSERQVALW</b><br/>                     251 <b>DTK</b>HLEEPSL LQELDTSSGV LLPFFDPTN IVYLCGKGDS SIRYFEITSE<br/>                     301 APFLHYLSMF SSKESQRMGM YMPKRGLEVN KCEIARFYKL</p>                                                                                                                                                                                                                                                                                                                                                                                                                                                                                                                                                                                                                                                                                                                                                                                                                                                                                                              |

|   |        |      |      |     |    |     |       |                                                                                                                                                                                                                                                                                                                                                                                                                                                                                                                                                                                                                                                                                                                                                                                                 |
|---|--------|------|------|-----|----|-----|-------|-------------------------------------------------------------------------------------------------------------------------------------------------------------------------------------------------------------------------------------------------------------------------------------------------------------------------------------------------------------------------------------------------------------------------------------------------------------------------------------------------------------------------------------------------------------------------------------------------------------------------------------------------------------------------------------------------------------------------------------------------------------------------------------------------|
|   |        |      |      |     |    |     |       | <p>HERRCEPIAM<br/>351 TVPRKSDLFQ EDLYPPTAGP DPALTAEEWL GGR<b>DAGPLLI</b><br/><b>SLKDGYPVPPK</b><br/>401 SRELRVNRLG DTGRRRAAPE ASGTPSSDAV SRLEEEMRKL<br/>QATVQELQKR<br/>451 LDRLEETVQA K</p> 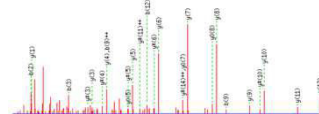                                                                                                                                                                                                                                                                                                                                                                                                                                                                                                                 |
| 4 | P50395 | 50,6 | 6,11 | 378 | 11 | 30% | GDIB  | <p>1 MNEEYDVIVL GTGLTECILS GIMSVNGKKV LHMDRNPYYG<br/><b>GESASITPLE</b><br/>51 <b>DLYKRFKIPG</b> SPPEMGRGR <b>DWNVDLIPKF</b> LMANGQLVK<b>M</b><br/><b>LLYTEVTRYL</b><br/>101 DFK<b>VTGESFV YKGGK</b>IYKVP STEAEALASS LMGLFEKRRF<br/><b>RKFLVYVANF</b><br/>151 <b>DEKDPRTFEG IDPKK</b>TTMRD VYKFKDLGQD VIDFTGHALA<br/>LYR<b>DDYLDQ</b><br/>201 <b>PCYETINRIK LYSESLARYG</b> KSPYLYPLYG LGELPQGFAR<br/>LSAIYGGTYM<br/>251 LNKPIEIIIV QNGKIVGVKS EGEIARCKQL ICDPSYVKDR<br/>VEKVGQVIRV<br/>301 ICILSHPIKN TNDANSCQII IPQNQVNRKS DIYVCMISFA<br/>HNVAQGGKYI<br/>351 <b>AVSTTVETK EPEKEIRPAL ELLEPIEQKF VSISDLLVPK</b><br/><b>DLGTESQIFI</b><br/>401 <b>SRTYDATHF</b> ETTCDIKNI YKRMTGSEFD FEEMKRKKND<br/>IYGED</p>  |
| 5 | P61160 | 44,7 | 6,30 | 72  | 2  | 3%  | ARP2  | <p>1 MDSQGRKVVV CDNGTGFVKC GYAGSNFPEH IFPALVGRPI<br/>IRSTTKVGNL<br/>51 EIK<b>DLMVGDE ASELRS</b>MLEV NYPMENGIVR NWDDMKHLWD<br/>YTFGPEKLN<br/>101 DTRNCKILLT EPPMNPTKNR EKIVEVMFET YQFSGVYVAI<br/>QAVLTLYAQQ<br/>151 LLTGVVVDSG DGVTHICPVY EGFSLPHLTR RLDIAGRDI<br/>RYLKLLLLL<br/>201 GYAFNHSADF ETVRMIKEKL CYVGYNIEQE QKLALETTVL<br/>VESYTLPDGR<br/>251 IIKVGGGERFE APEALFQPHL INVEGVGVAE LLFNTIQAAD<br/>IDTRSEFYKH<br/>301 IVLGGSTMY PGLPSRLERE LKQLYLERVL KGDVEKLSKF<br/>KIRIEDPPRR<br/>351 KHMVFLGGAV LADIMDKDN FWMTRQEYQE<br/>KGVRLLEKLG VTVR</p>                                                                                                                                                       |
| 6 | P62333 | 44,1 | 7,10 | 244 | 10 | 27% | PRS10 | <p>1 MADPRDKALQ DYRKLLLEHK EIDGRKELR EQLKELTK<b>QY</b><br/><b>EKSENDLKAL</b><br/>51 <b>QSVGQIVGEV LKQL</b>TEEKFI VKATNGPRYV VGCRRQDKS<br/>KLKPGTRVAL<br/>101 <b>DMTTLTIMRY</b> LPREVDPLVY NMSHEDPGNV SYSEIGGLSE<br/>QIRELREVIE<br/>151 <b>LPLTNPFLFQ RVGII</b>PPKGC <b>LLYGPPTGK</b> TLLARAVAS<b>Q</b><br/><b>LDCNFLKVVS</b><br/>201 <b>SSIVDKYIGE SARLIREMFN YAR</b>DHQPCII FMEIDAIGG<br/><b>RRFSEGTSAD</b><br/>251 <b>REIQR</b>TMEL LNQMDGFDTL HRVKMIMATN RPDTLDPALL<br/>RPGRLDRKI<br/>301 IDLPNEQARL DILKIAGPI TK<b>HGEIDYEA IVKLS</b>DGFNG<br/><b>ADLRNVCTEA</b><br/>351 <b>GMFAIRADHD</b> FVVQEDFMKA VRKVADSKKL ESKLDYKPV</p>                                                                         |
| 7 | P78406 | 40,9 | 7,96 | 135 | 6  | 19% | RAE1L | <p>1 MSLFGTTSGF GTSGTSMFGS ATTDNHNPMK DIEVTSPPD<br/>SIGCLSFSP<br/>51 TLPGNFLIAG SWANDVRCWE VQDSGQTIPK AQMHTGPVL<br/>DVCWSDDGSK<br/>101 VFTASCDKTA KMWDLSSQA IQIAQHDAPV KTIHWIKAPN<br/>YSCVMTGSWD<br/>151 KTLKFWDT<b>RS SNPMMLQLP</b> ERCYCADVIY PMAVVATAER<br/><b>GLIVYQLENQ</b><br/>201 <b>PSEFR</b>RIESP LKHQHRCAI FKDK<b>QNKPTG FALGSIEGRV</b><br/><b>AIHYINPPNP</b><br/>251 <b>AKDN</b>FTFKCH RSNGTNTSAP QDIYAVNGIA FHPVHGTLAT<br/>VGS<b>DGRFSFW</b><br/>301 <b>DKDAR</b>TKLKT SEQLDQIPSA CCFNHNNGNIF AYASSYDWSK<br/>GHEFYNPQKK<br/>351 <b>NYIFLR</b>NAAE ELKPRNKK</p>                                                                                                                                 |



|   |        |      |      |     |   |     |       |                                                                                                                                                                                                                                                                                                                                                                                                                                      |
|---|--------|------|------|-----|---|-----|-------|--------------------------------------------------------------------------------------------------------------------------------------------------------------------------------------------------------------------------------------------------------------------------------------------------------------------------------------------------------------------------------------------------------------------------------------|
|   |        |      |      |     |   |     |       |                                                                                                                                                                                                                                                                                                                                                                                                                                      |
| 8 | P09211 | 23,3 | 5,43 | 432 | 6 | 49% | GSTM3 | <p>1 M<sup>+</sup>CESSMVLG YWDIRGLAHA IR<b>LLLEFTDT SYEEKRYTCG</b><br/>EAPDYDRSQW<br/>51 LDVKFKLDLD FPNLYLLDG KNK<b>ITQSNAI LRY</b>ARKHNM<br/>CGETEEEKIR<br/>101 <b>VDIENQVMD FR</b>TQLIRLCY SSDHEKLPQ YLEELPGQLK<br/>QFSMFLGKFS<br/>151 WFAGEKLTFF DFLTYDILDQ NRIFDPK<b>CLD EFPNLK</b>AFMC<br/>RFEALEKIAA<br/>201 YLQSDQFCMK PINNKMAQWG NKPVC</p>                                                                                   |
| 9 | P30048 | 27,6 | 7,67 | 113 | 6 | 22% | PRDX3 | <p>1 MAAAVGRLLR ASVARHVS<sup>+</sup>AI PWGISATAAL RPAACGR<sup>+</sup>TSL<br/>TNLLCSGSSQ<br/>51 AKLFSTSSSC HAPAVTQHAP YFKGTAVVNG EFK<b>DLSLDDF</b><br/><b>KGKYL</b>VLFFY<br/>101 PLDFTFVCPT EIVAFSDKAN EFHDVNCEVV AVSVDSHFSH<br/>LAWINTPRKN<br/>151 GGLGHMNIAL LSDLTKQISR <b>DYGV</b>LEGS<b>G LALRGLFIID</b><br/><b>PNGVIK</b>HLSV<br/>201 <b>N</b>DL<b>PVGRSVE ETLRLV</b>KAFQ YVETHGEVCP ANWTPDSPTI<br/>KPSPASKEY<br/>251 FQKVNQ</p> |
